# Supplementary material
Source: PubMed Central journal article supplement (PMC11485225)
Supplement: NIHMS2002523-supplement-Sup_Fig7.pdf [file NIHMS2002523-supplement-Sup_Fig7.pdf]

**A**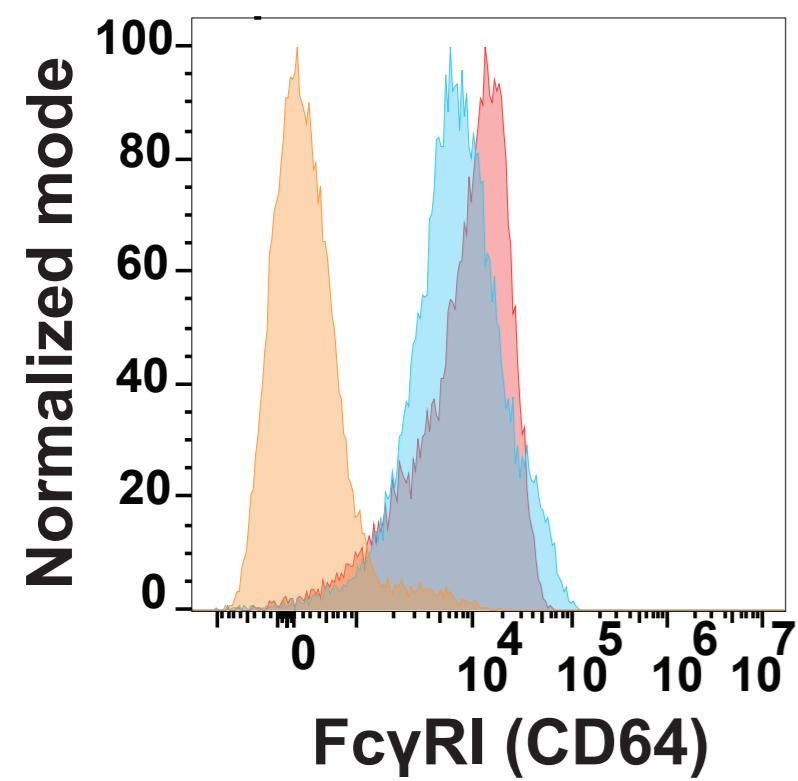**B**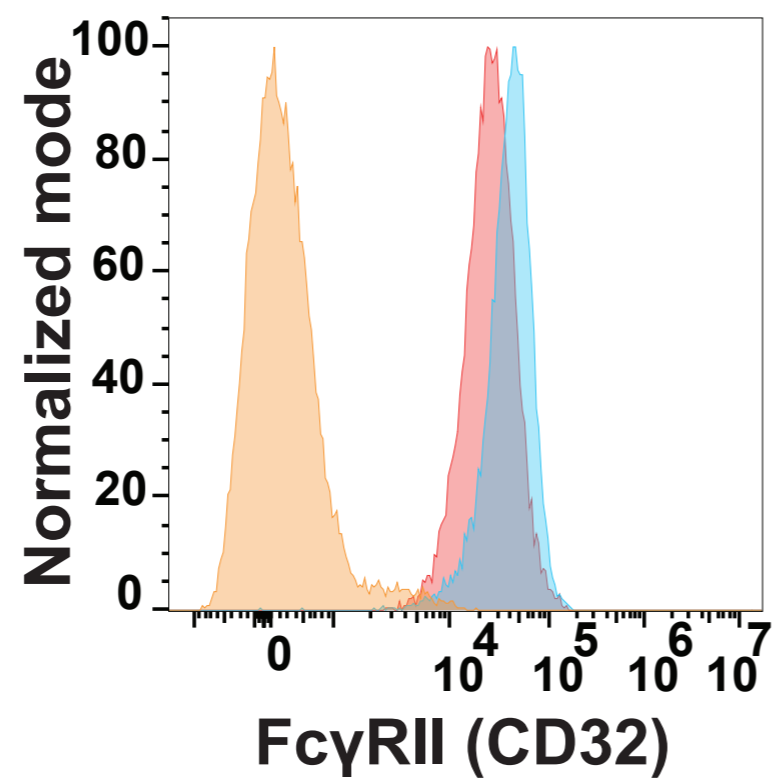**C**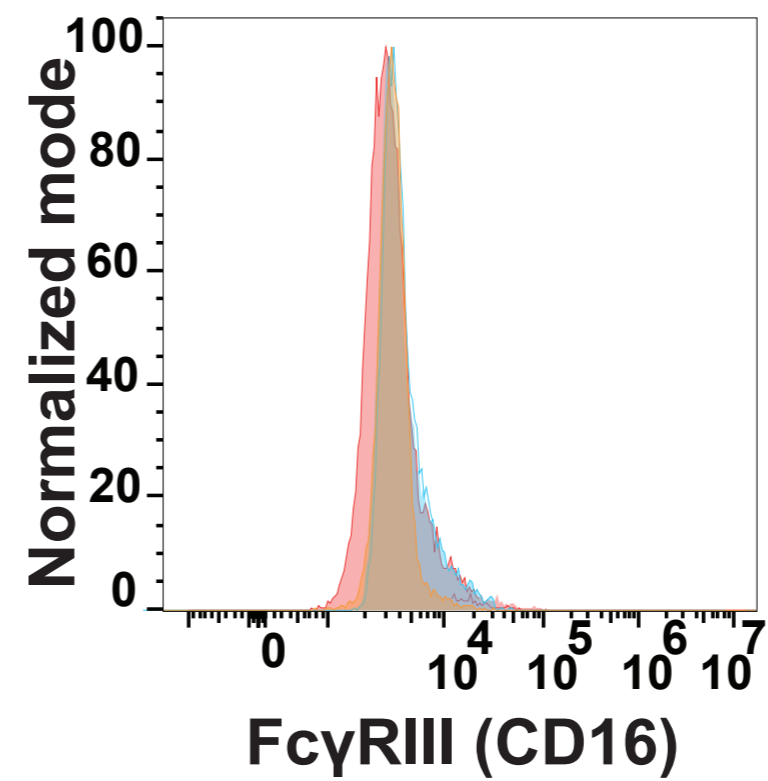**D**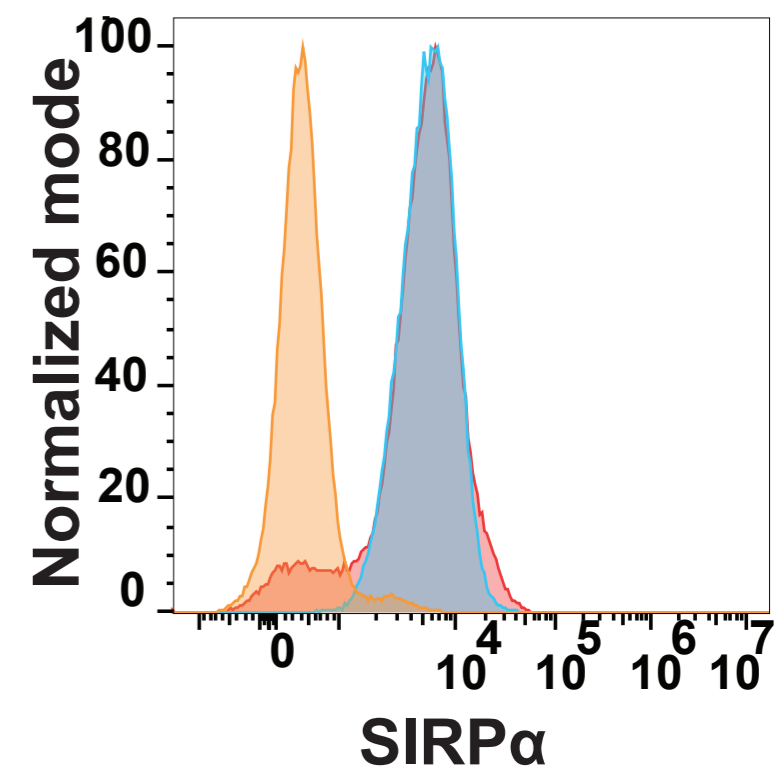

WT

 $\Delta G\beta_4$ 

unstained control

**E**

3D projection

WT

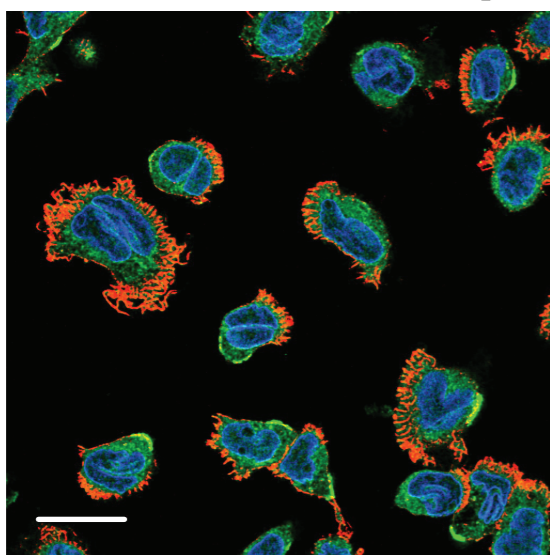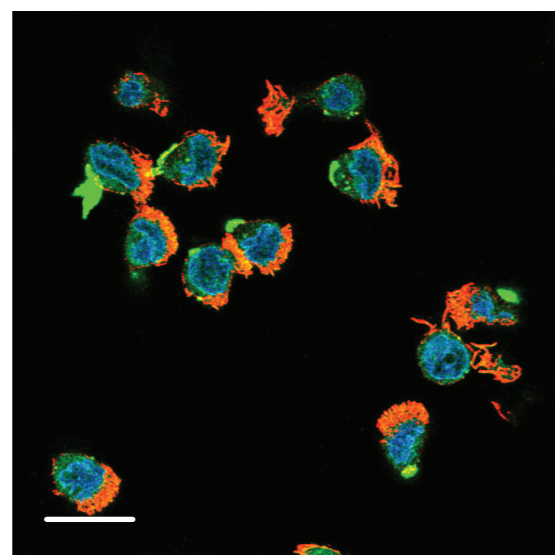 $\Delta G\beta_4$ 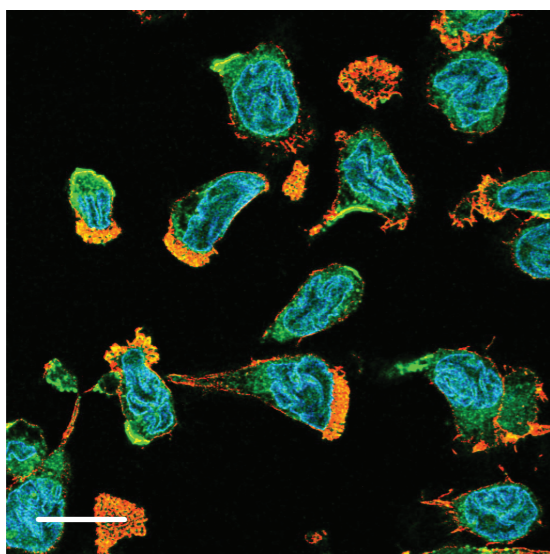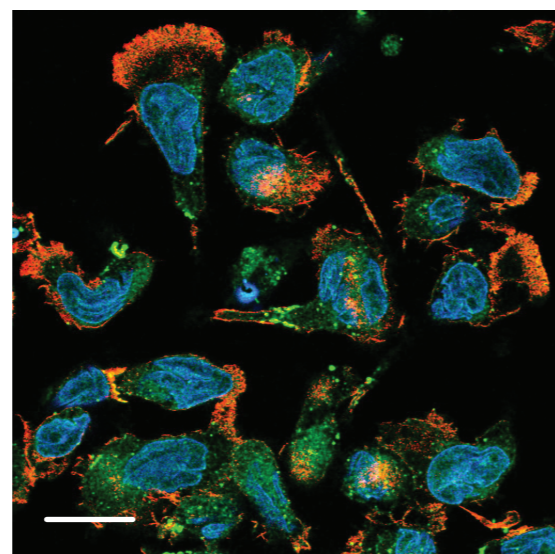

Phalloidin

Nucleus

plasma membrane

**F**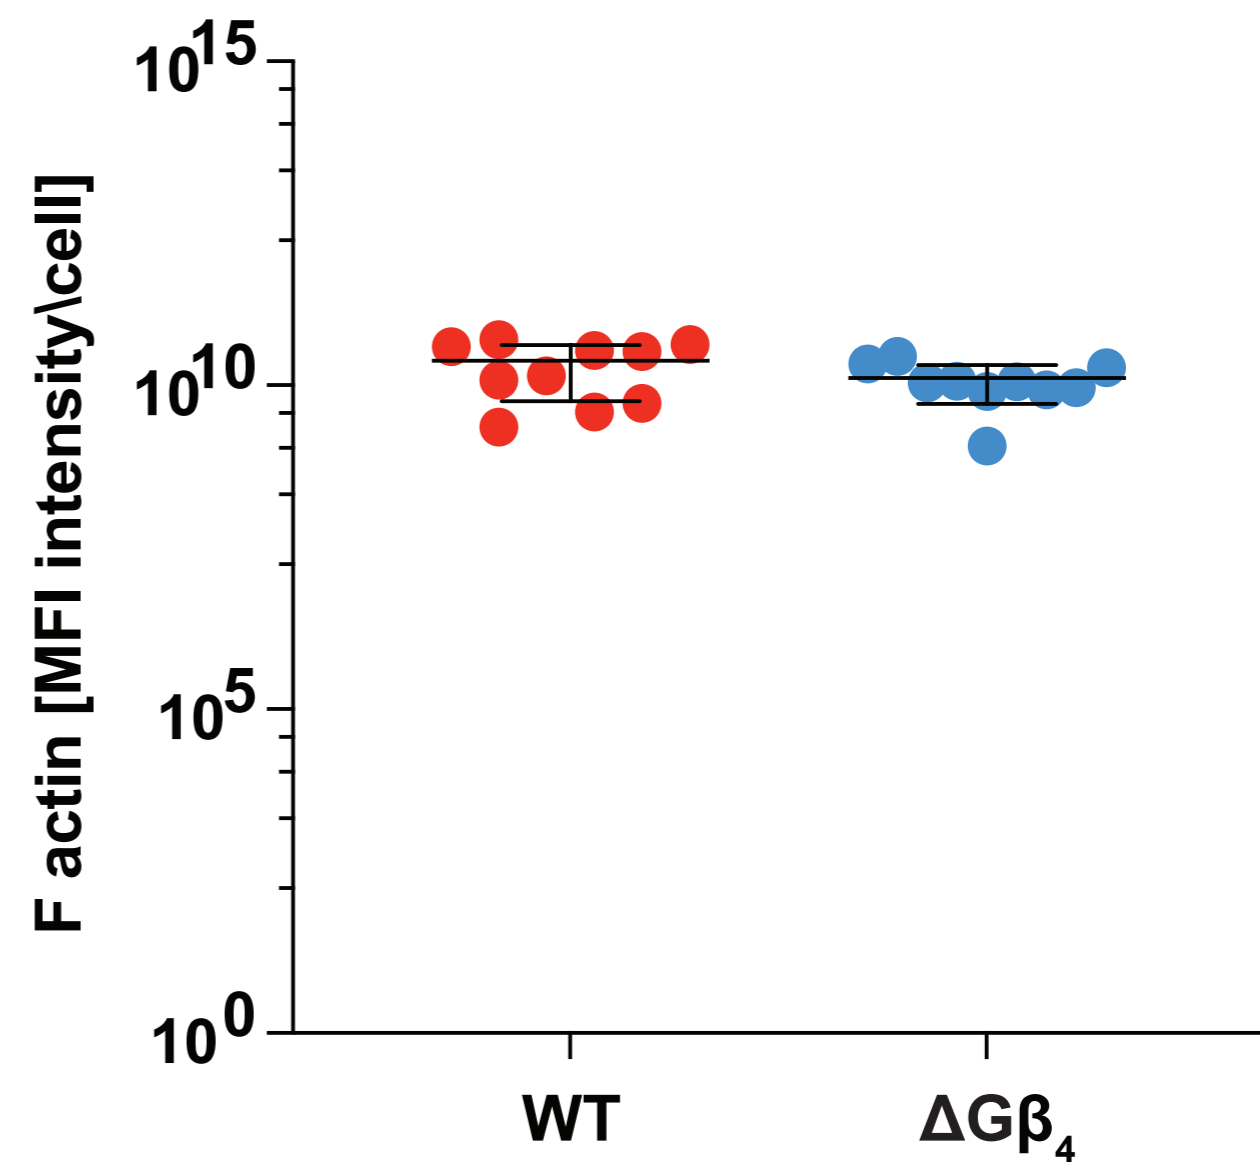

WT

 $\Delta G\beta_4$
