# Supplementary material
Source: PubMed Central journal article supplement (PMC11485225)

# A Macrophage differentiation from hiPSCs

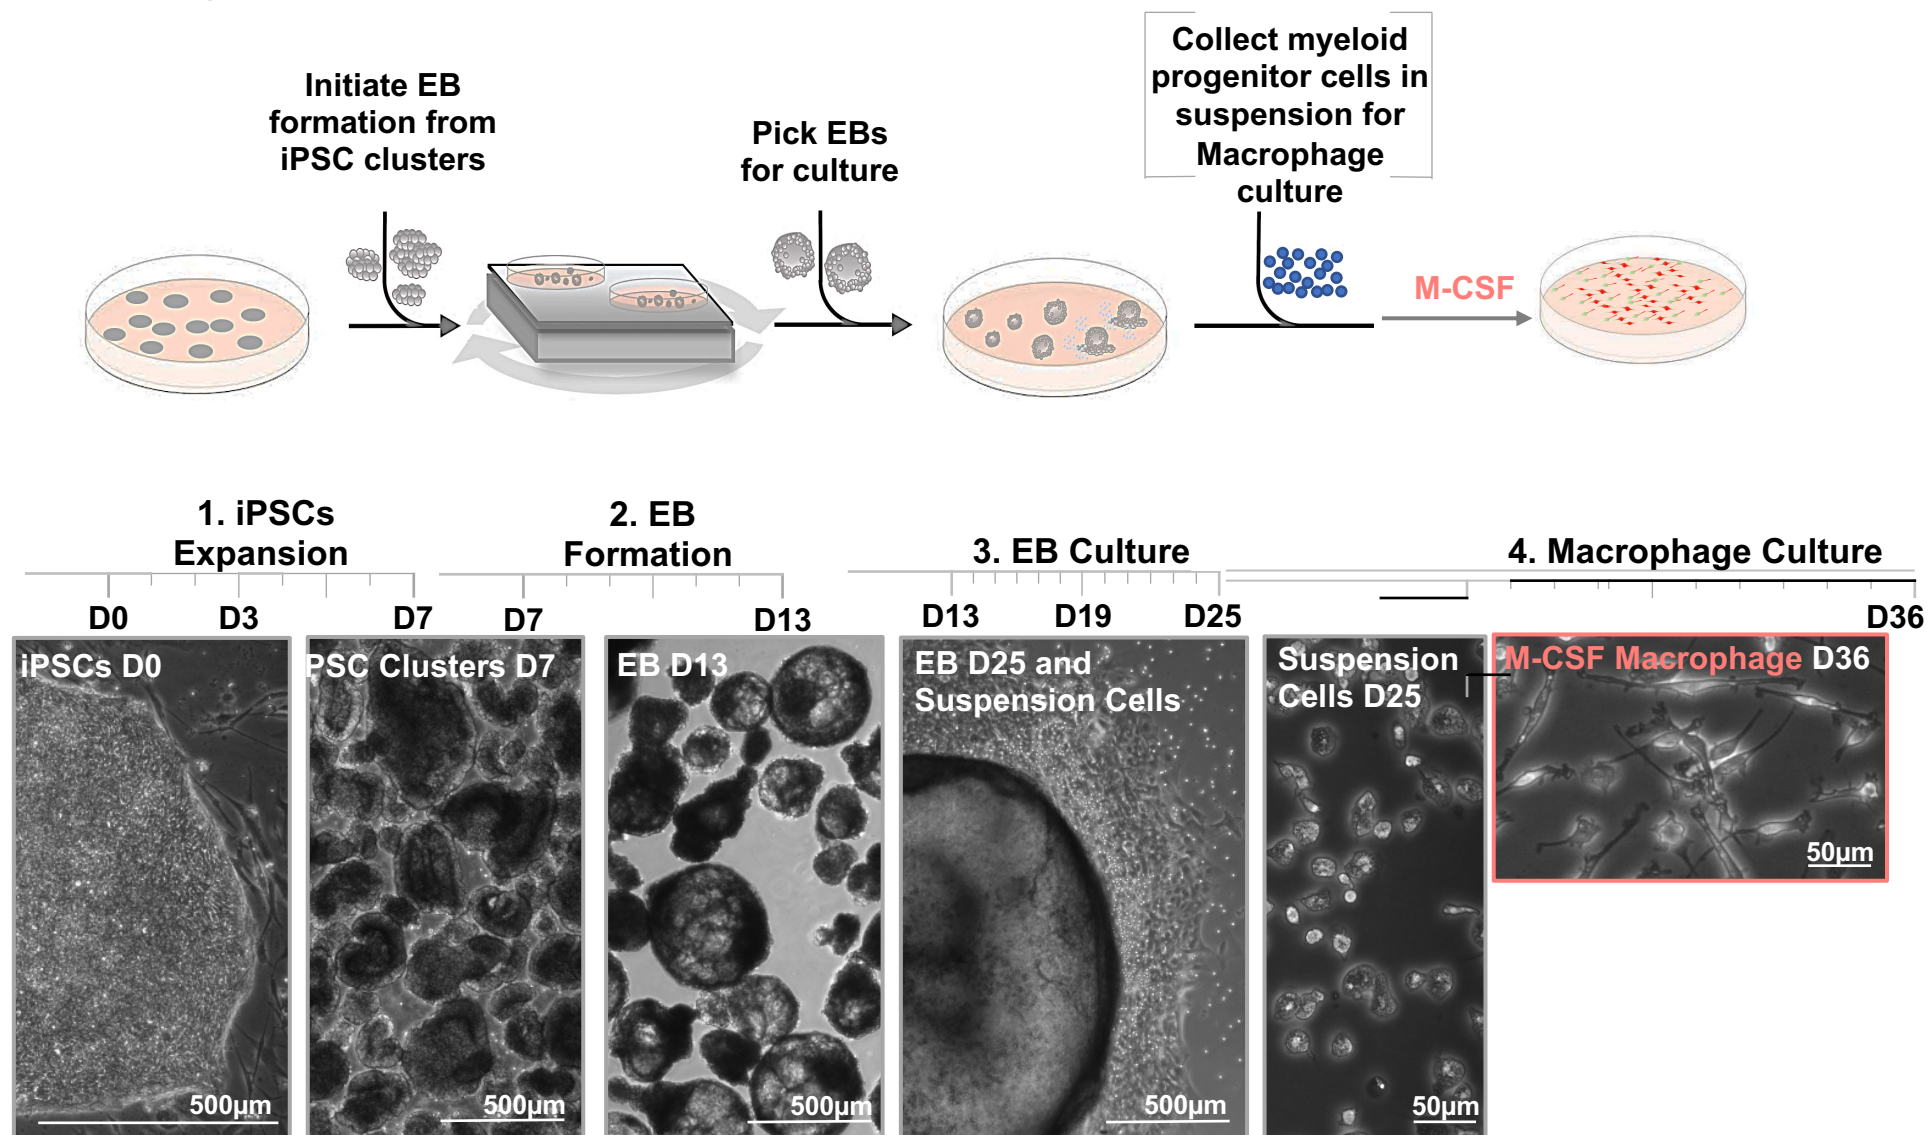

## B

### GNB4 KO in 731 iPSCs

| Gene KO | sgRNA target             | PCR-F1                   | PCR-R1                     | PCR-F2 (used for seq)       |
|---------|--------------------------|--------------------------|----------------------------|-----------------------------|
| GNB4    | TGCGAACAAGA<br>CGTACACTG | TGATCCCATAA<br>CGGCTCTGT | TCCTCTTCTGAA<br>CAGTTGTCCT | TCCTCACTGTTTCT<br>AGTTCAAGT |

sgRNA target

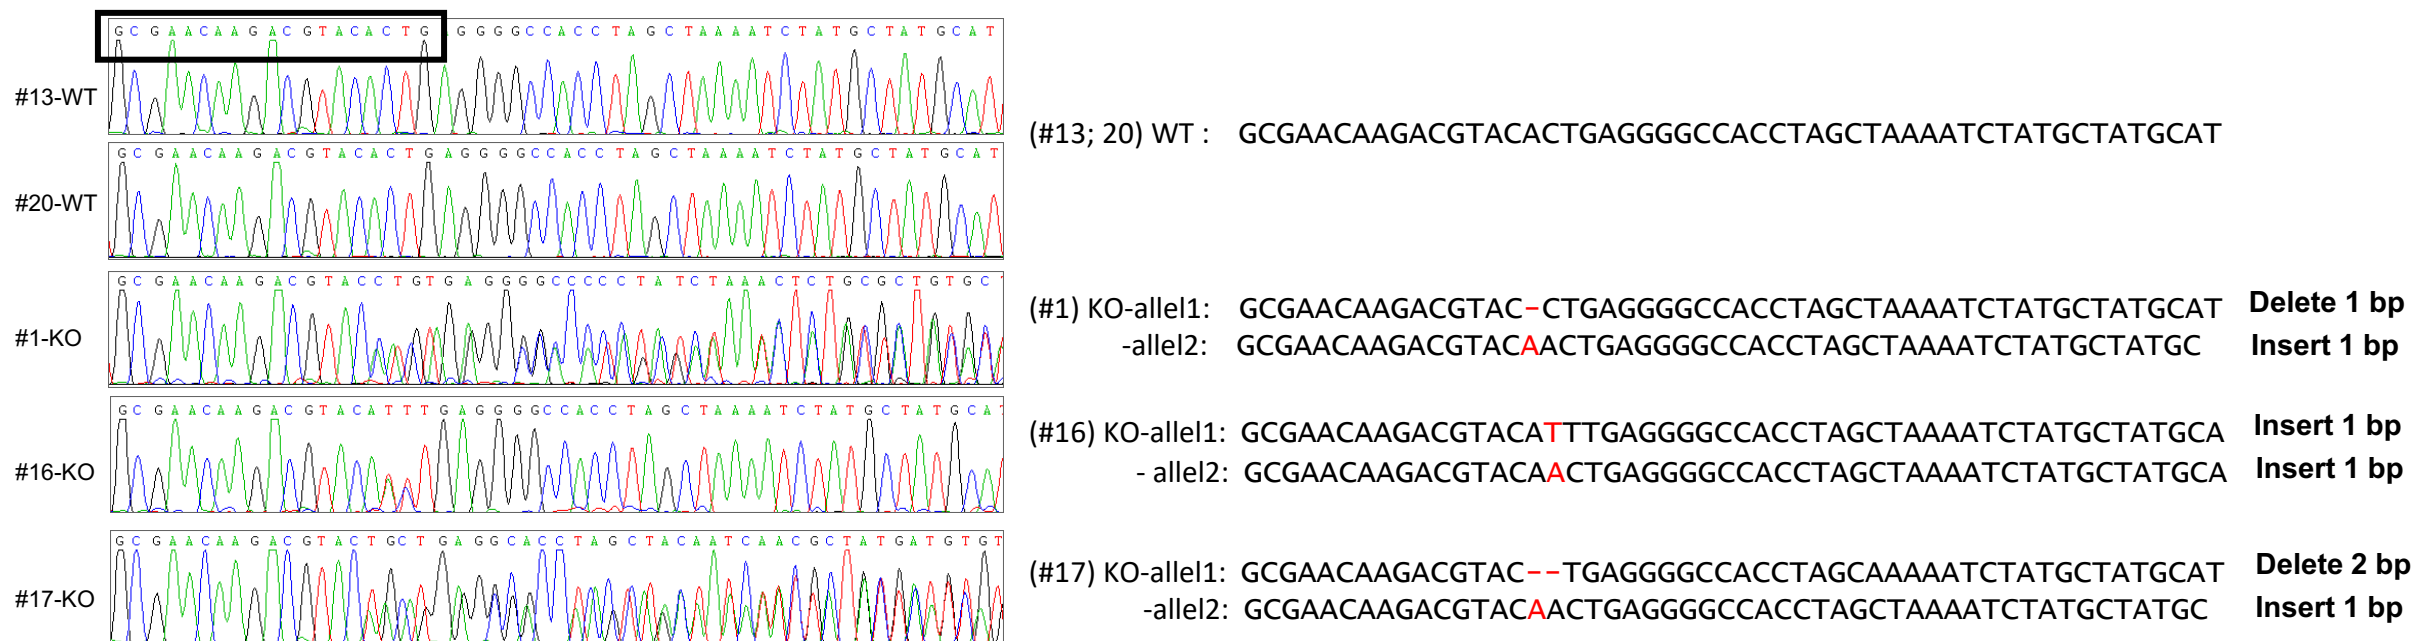

## C

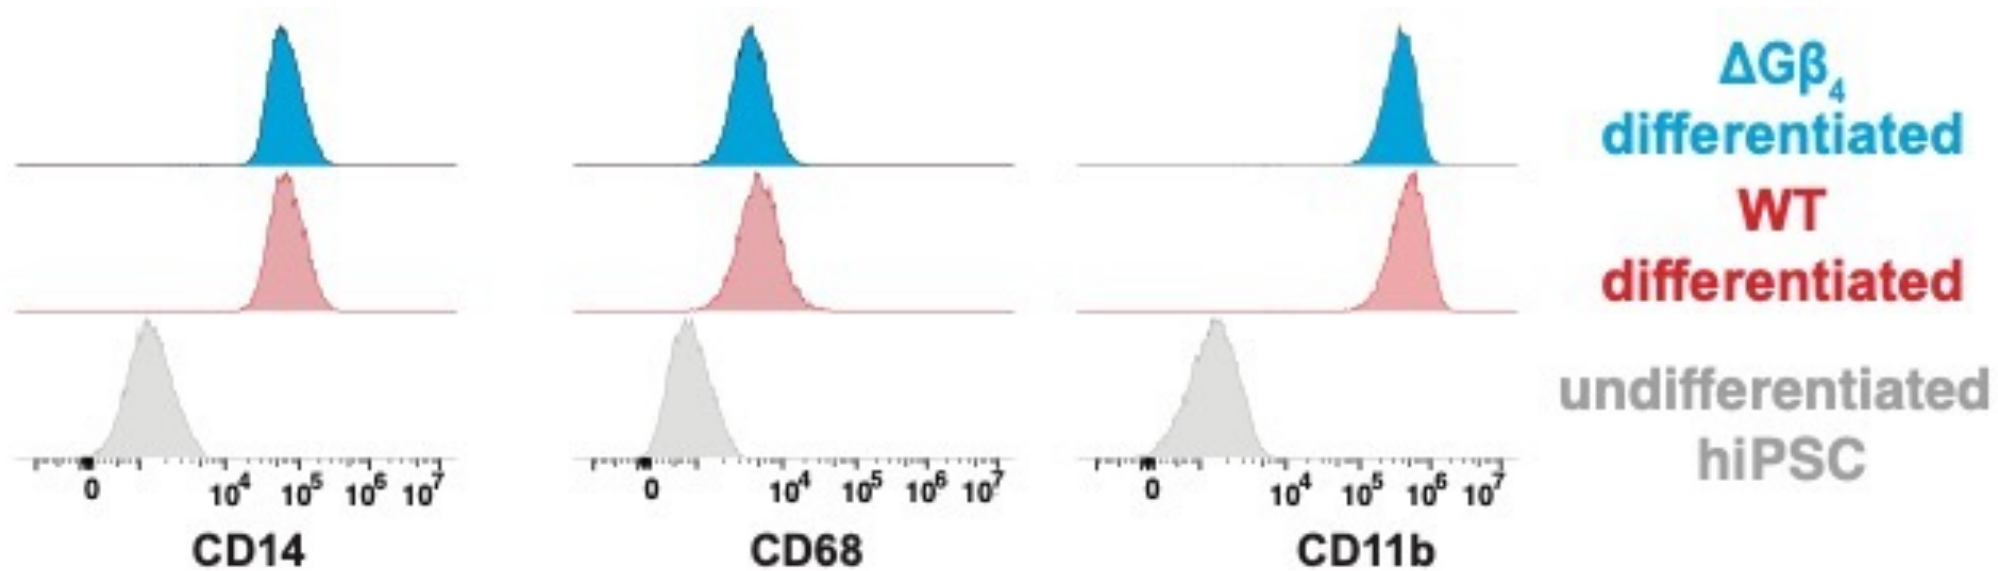

Supplement: NIHMS2002523-supplement-Sup_Fig11.pdf [file NIHMS2002523-supplement-Sup_Fig11.pdf]
