# Supplementary material
Source: PubMed Central journal article supplement (PMC11485225)

A

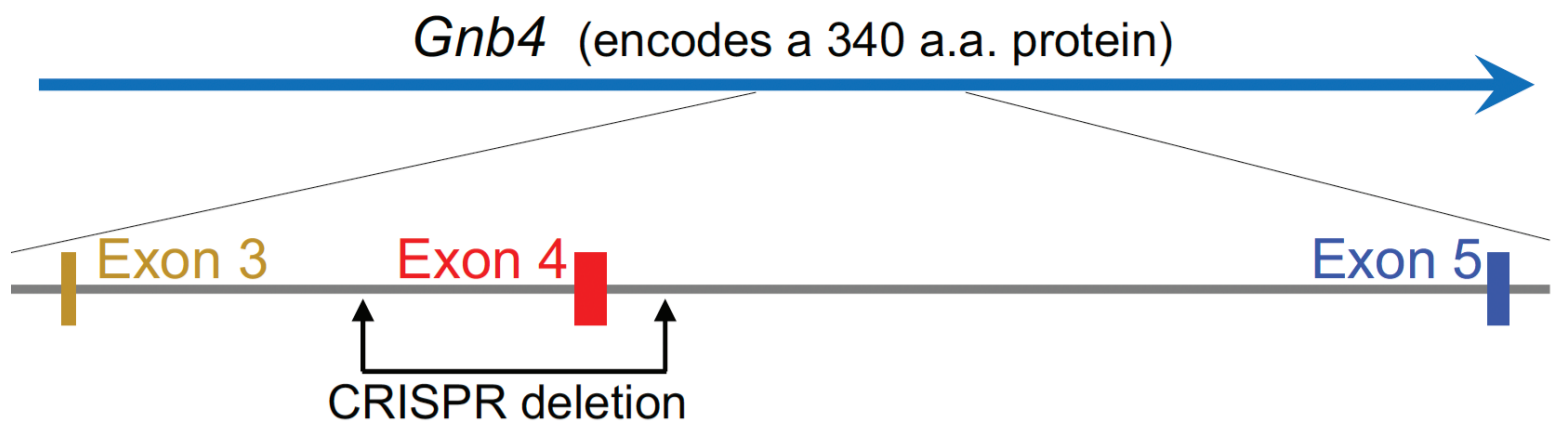

WT mRNA

GATGCT...GTTTCAGATCACGTCTAATATGGACTCCGTGGGCCGAATACAA...TCCAGGCTACTAGTCAGT...AATAAG

D A V Q I T S N M D S V G R I Q S R L L V S N K

20 21 31 32 33 34 35 36 37 38 39 40 41 42 43 44 67 68 69 70 71 72 88 89

KO mRNA

GATGCT...GTTTCAGGCTACTAGTCAGTGCTTCGCAAGATGGAAAATTAATTATTTGGGATAG...AATAAG

D A V Q A T S Q C F A R W K I N Y L G \*

20 21 31 32 33 34 35 36 37 38 39 40 41 42 43 44 45 68 69

B

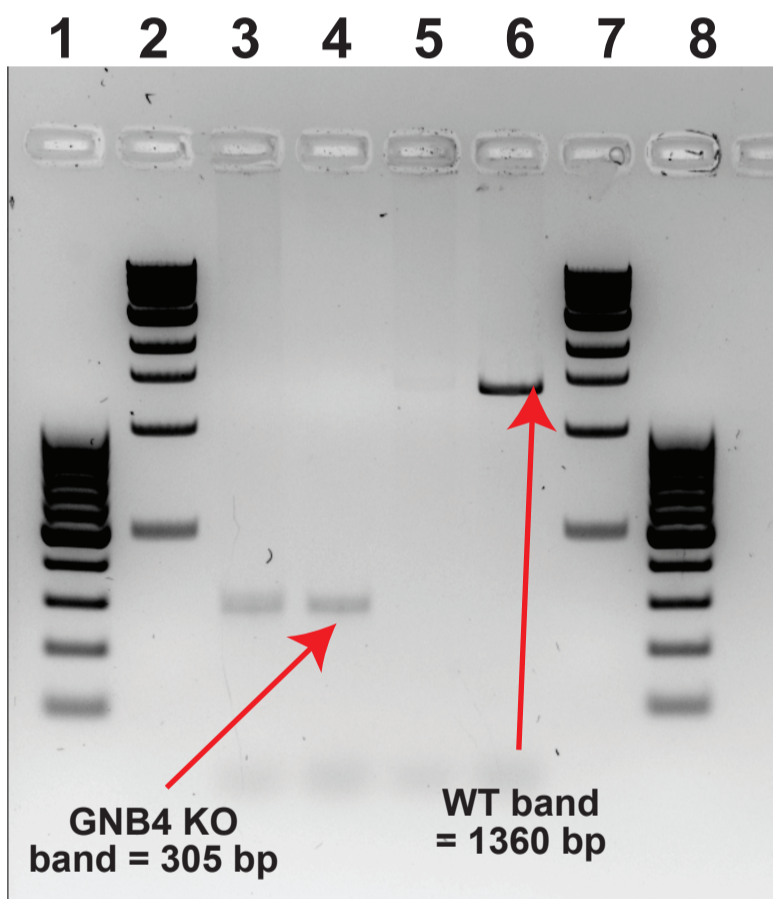

C

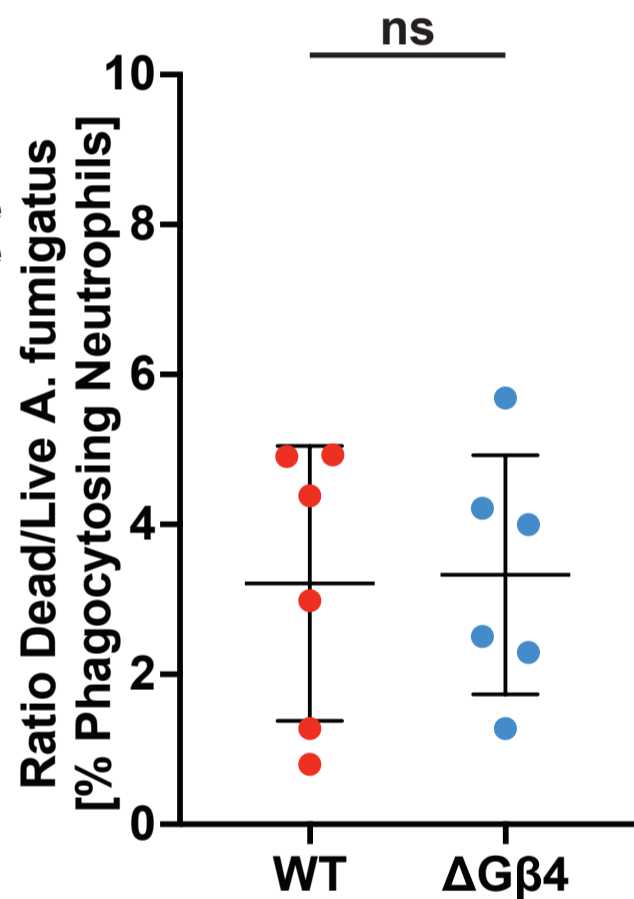

D

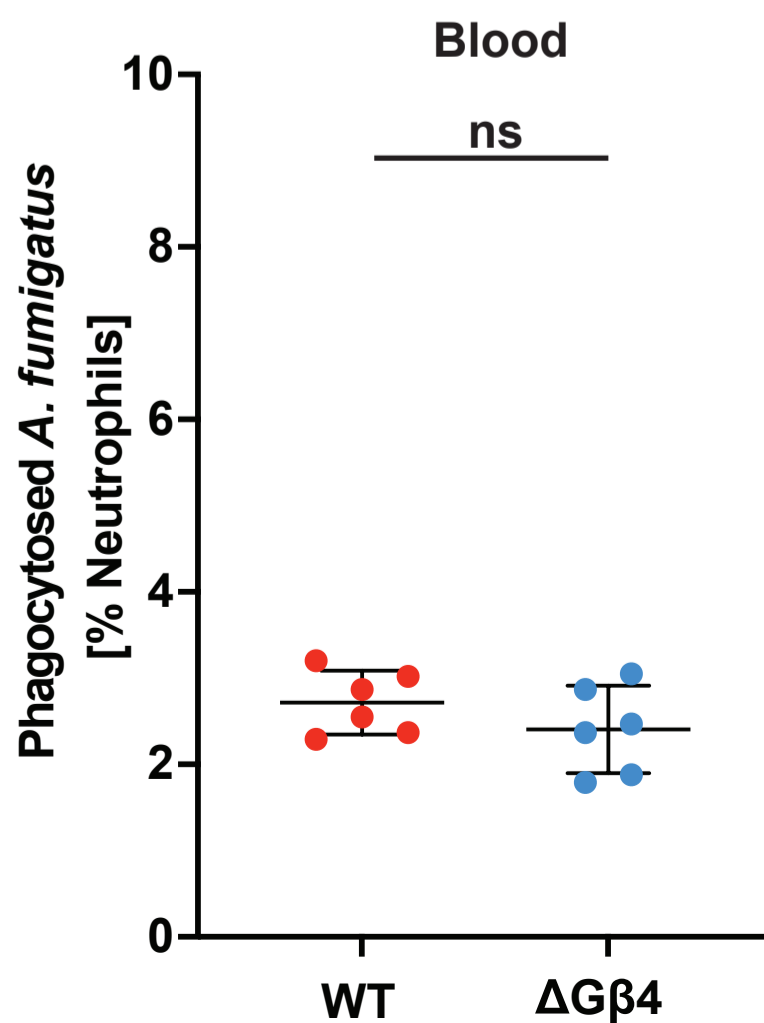

Supplement: NIHMS2002523-supplement-Sup_Fig12.pdf [file NIHMS2002523-supplement-Sup_Fig12.pdf]
