# Supplementary material
Source: PubMed Central journal article supplement (PMC11485225)
Supplement: NIHMS2002523-supplement-Sup_Fig13.pdf [file NIHMS2002523-supplement-Sup_Fig13.pdf]

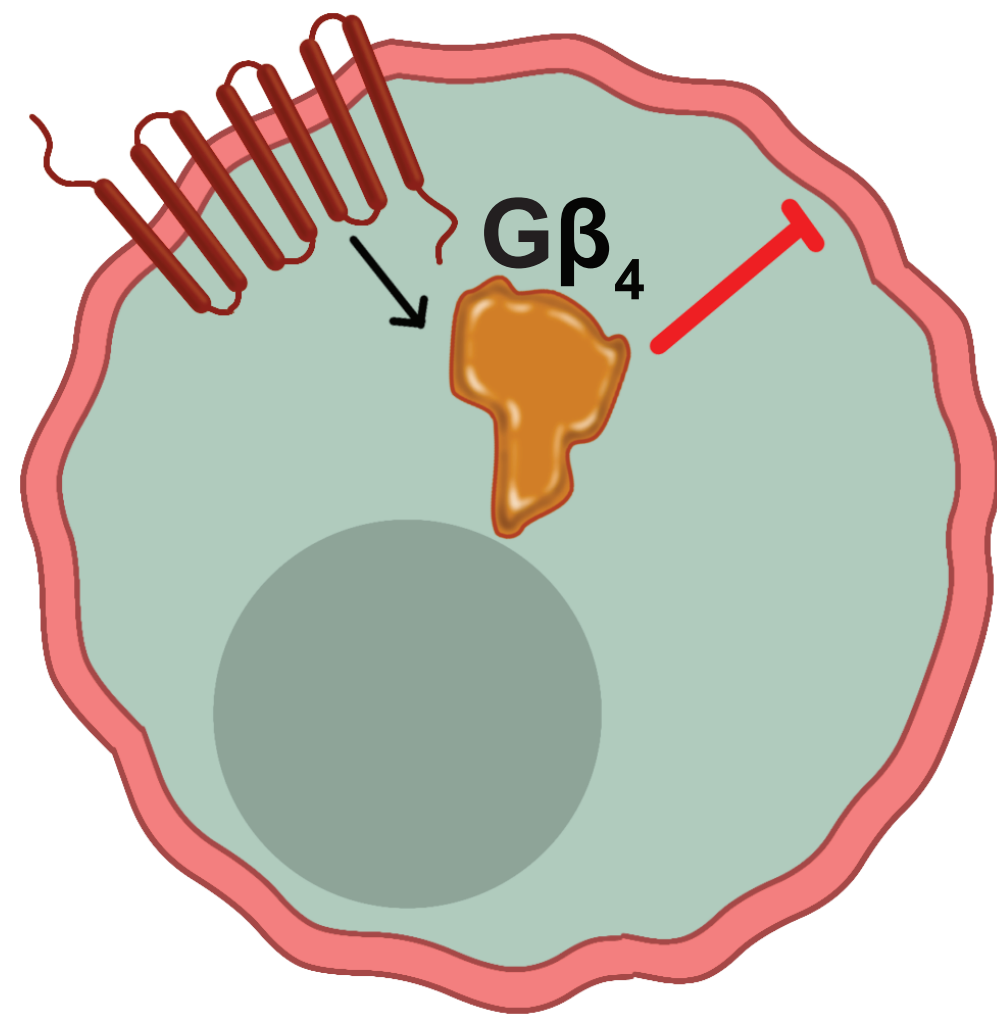

WT cells  
Differentiated

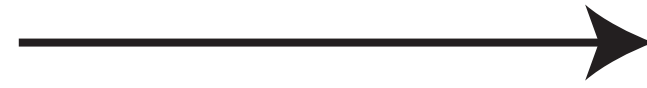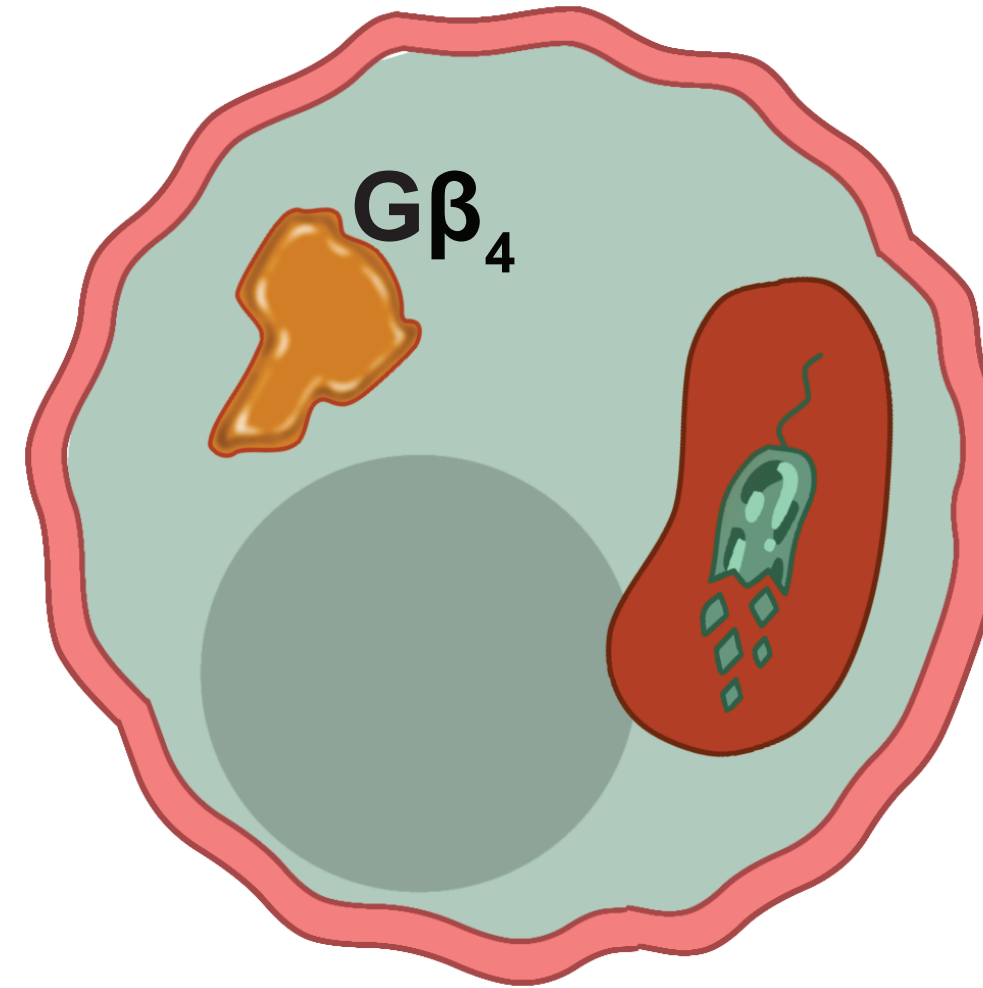

Phagocytosis

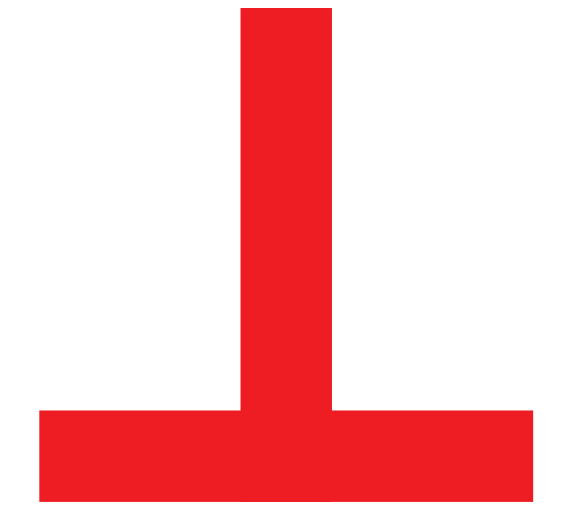

Migration

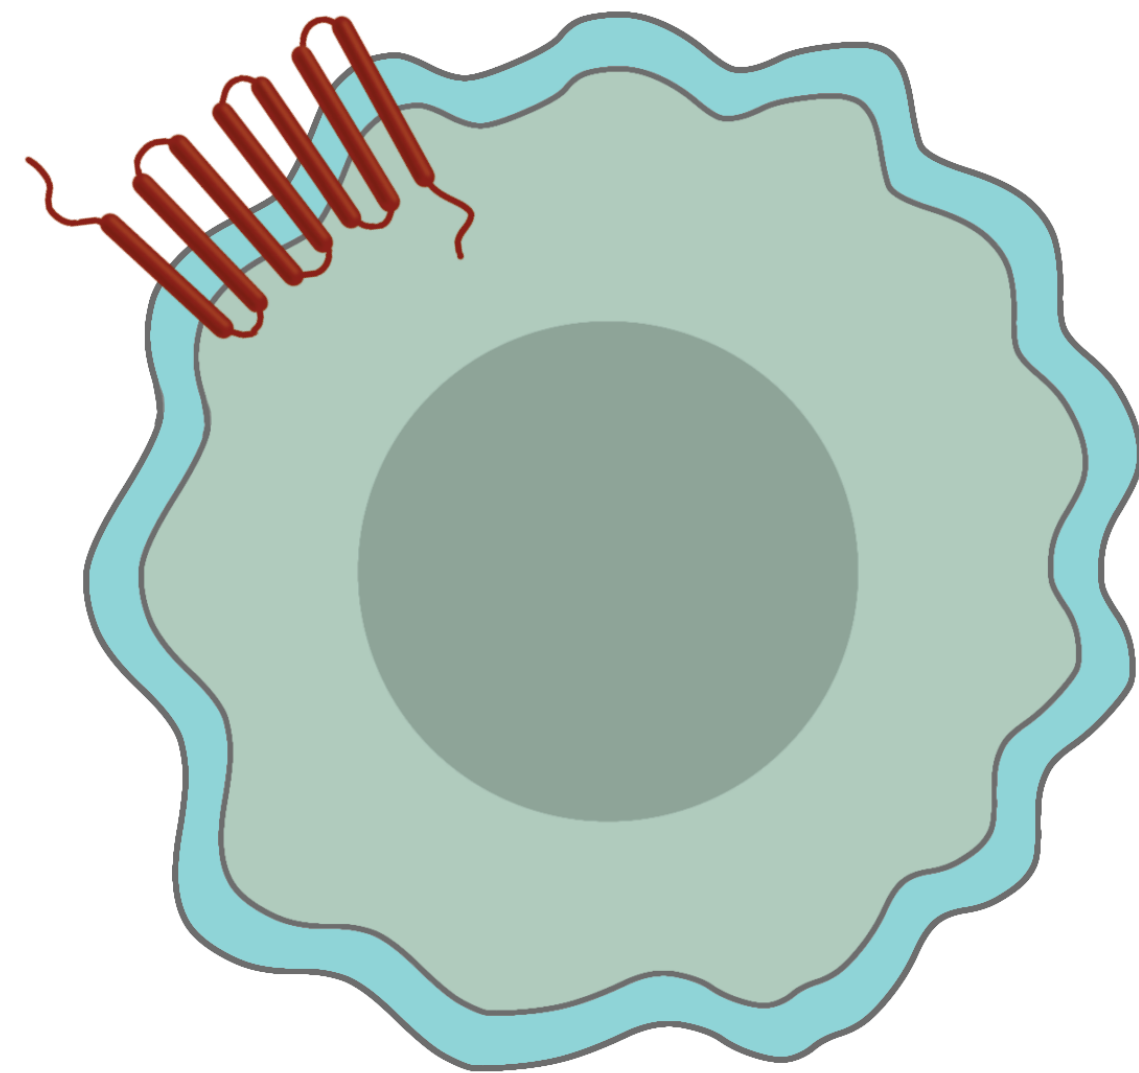

$\Delta G\beta_4$  cells  
Differentiated

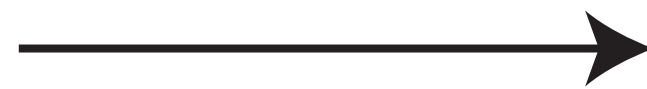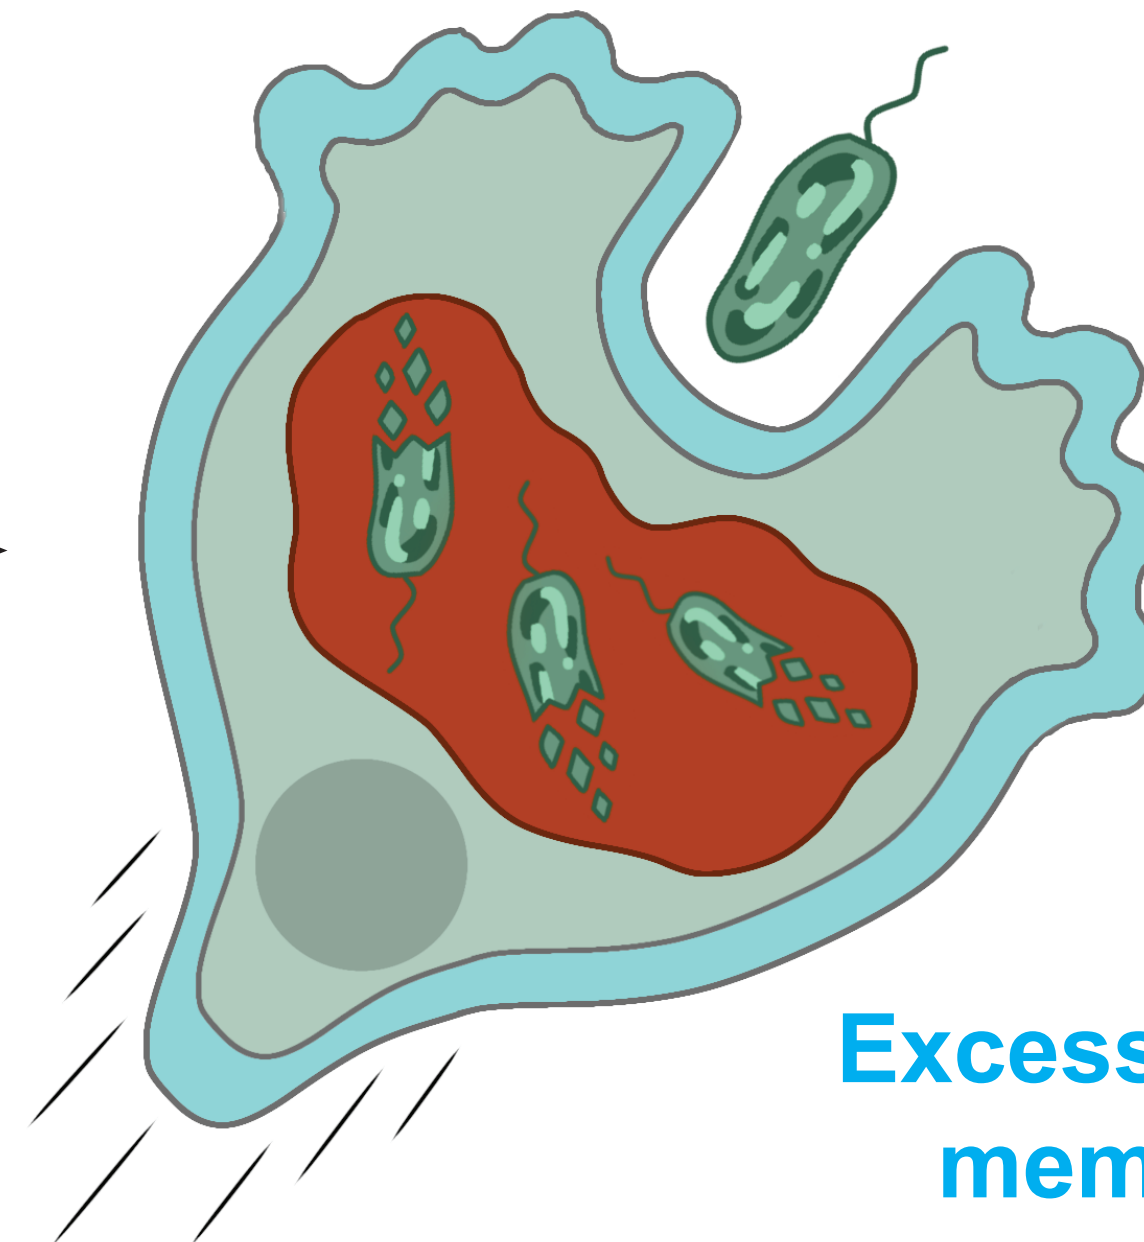

Phagocytosis

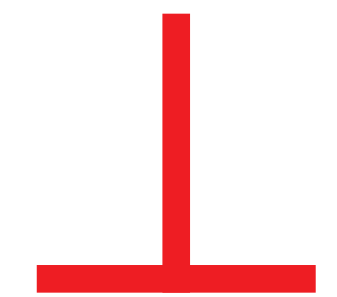

Migration

Excess plasma  
membrane
