# Supplementary material
Source: PubMed Central journal article supplement (PMC11485225)

**A**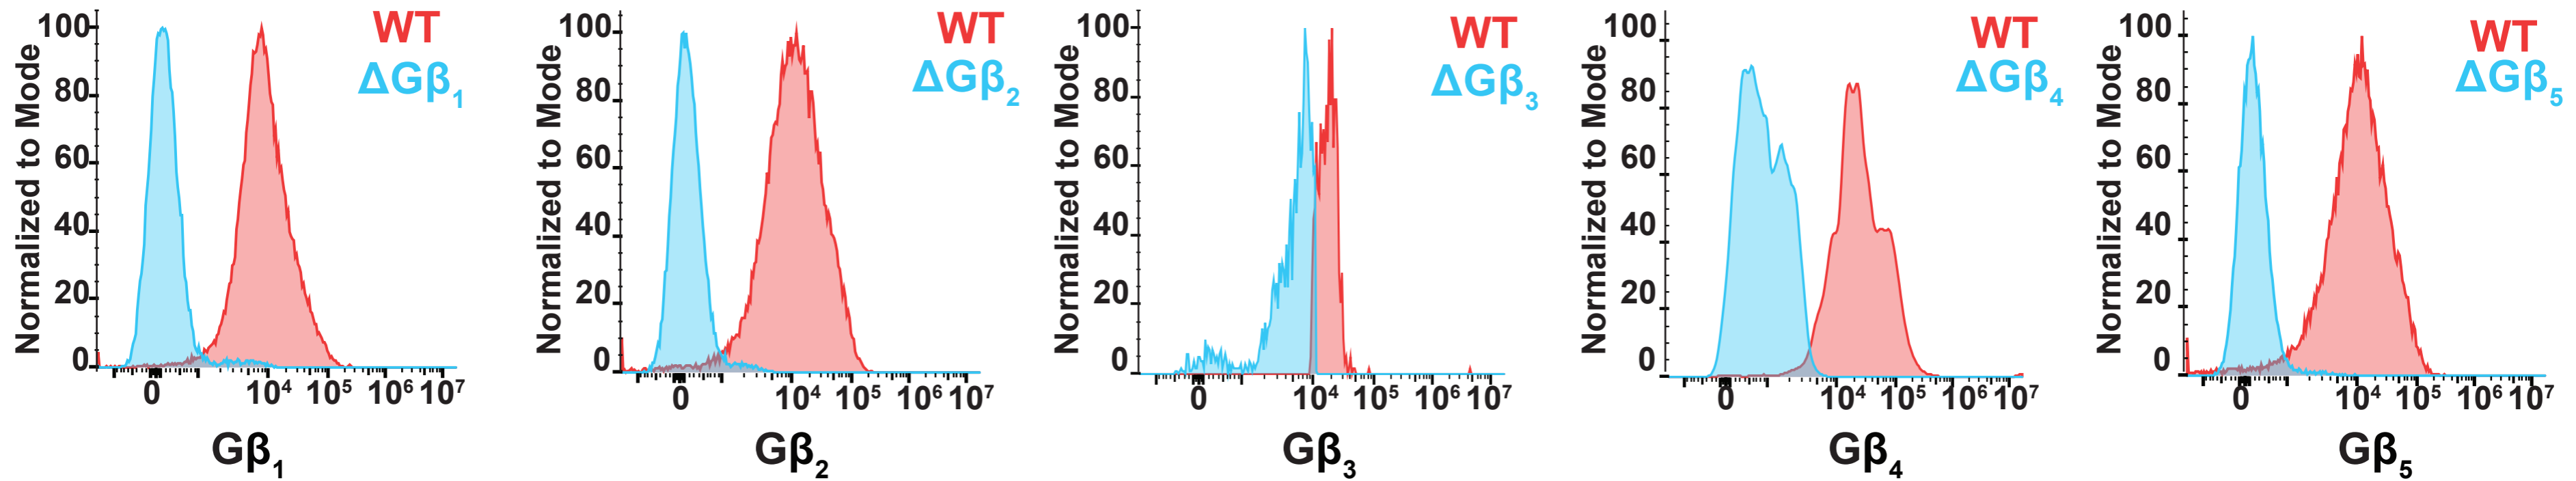**B**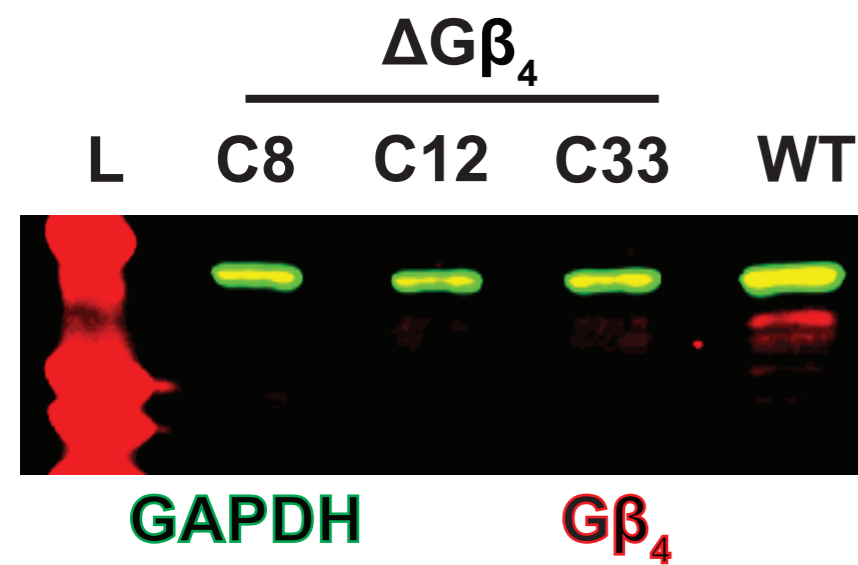**C**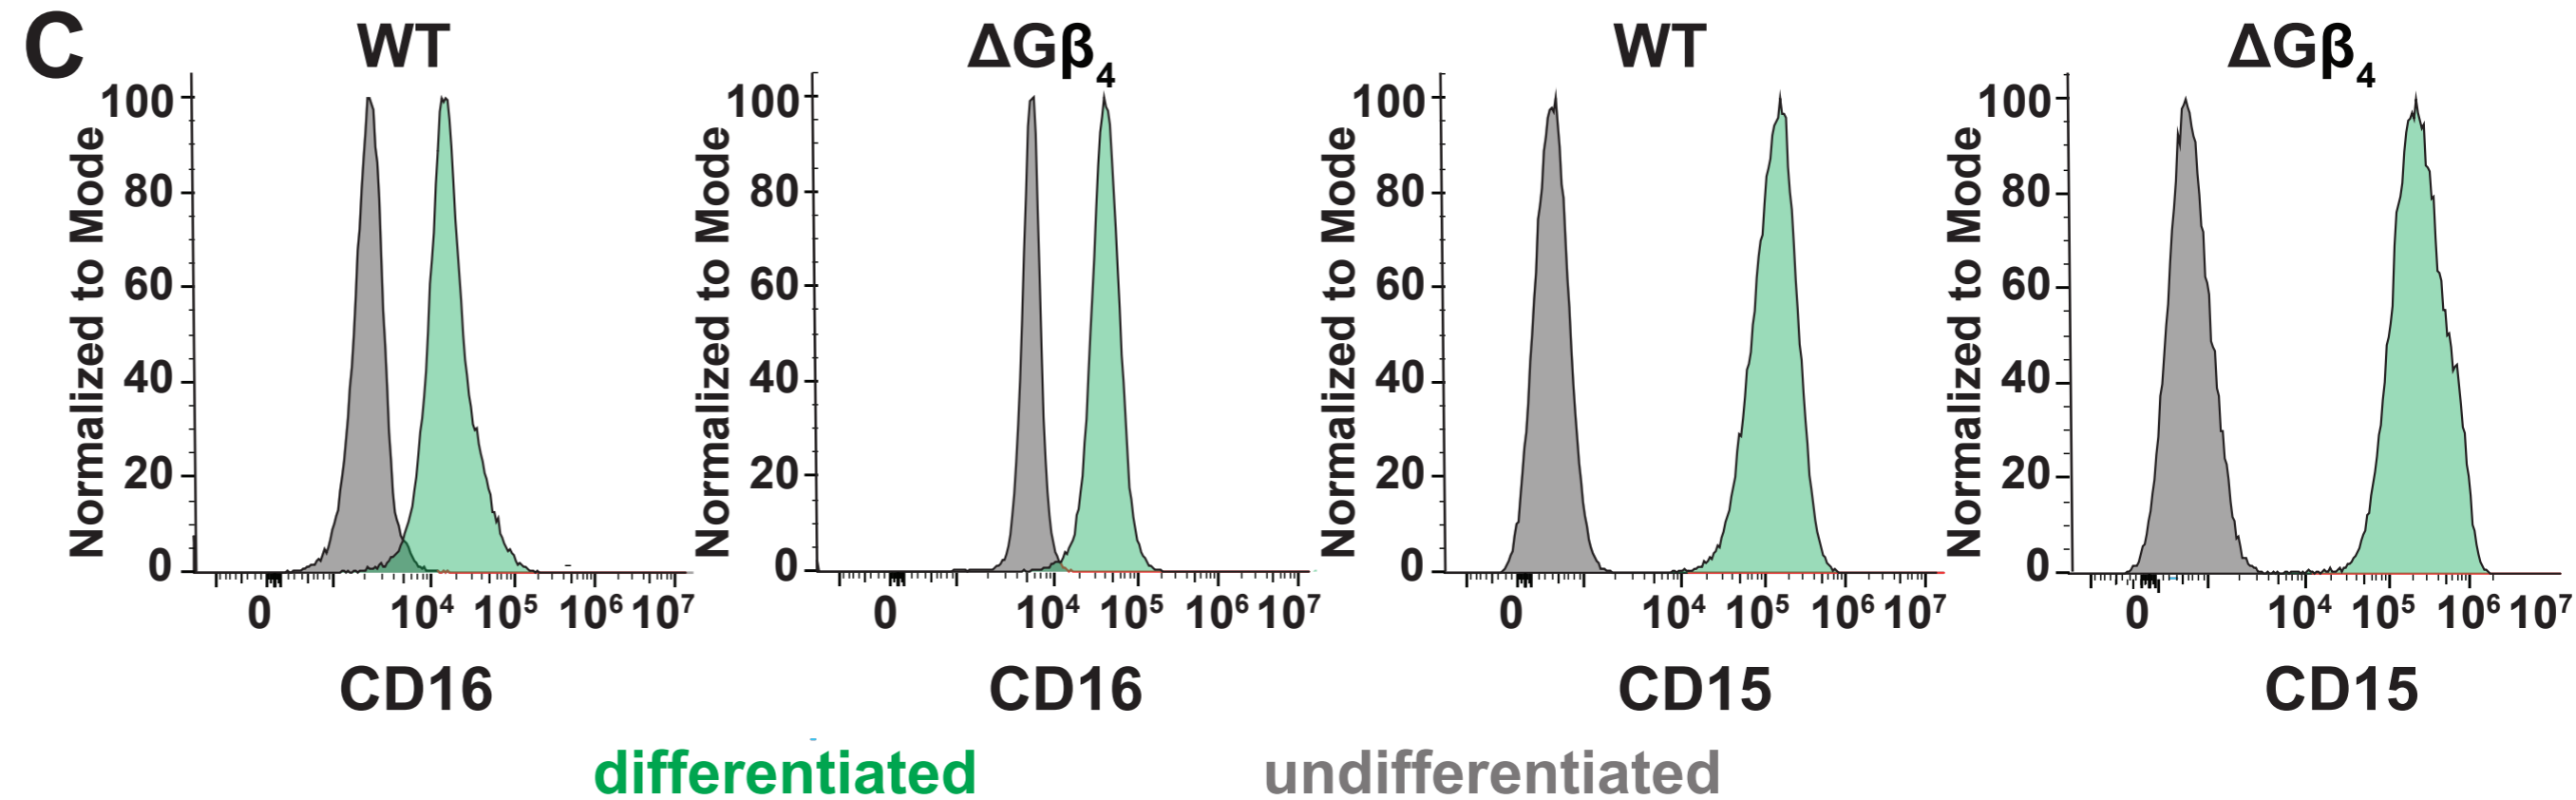

Supplement: NIHMS2002523-supplement-Sup_Fig1.pdf [file NIHMS2002523-supplement-Sup_Fig1.pdf]

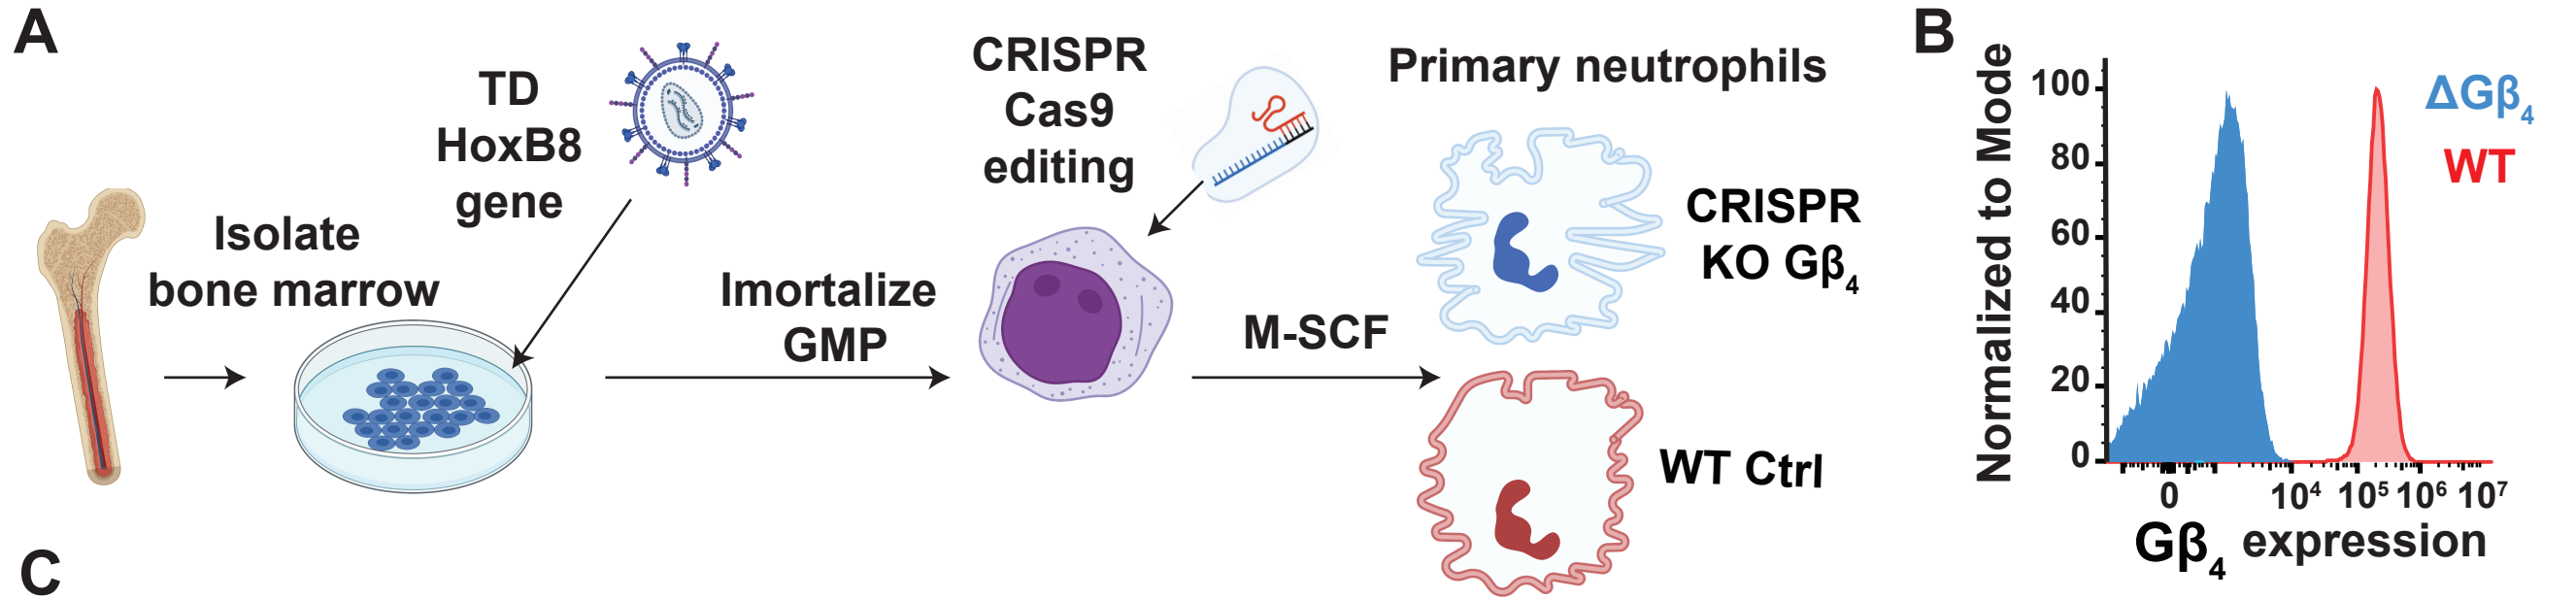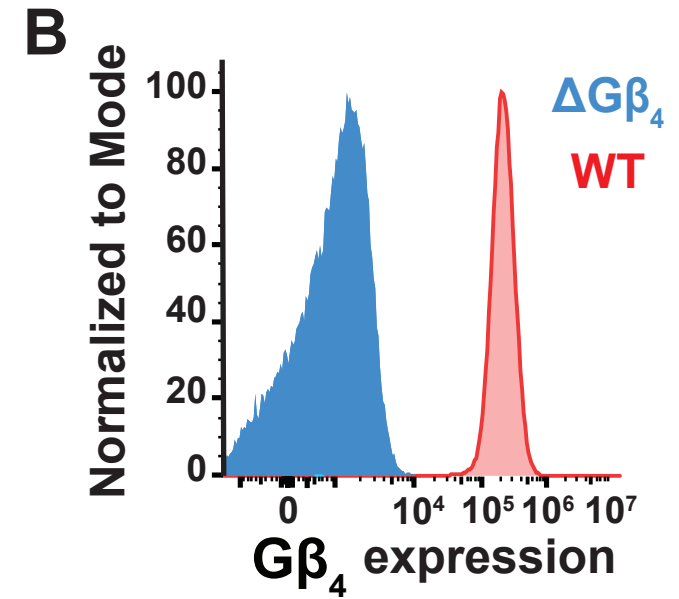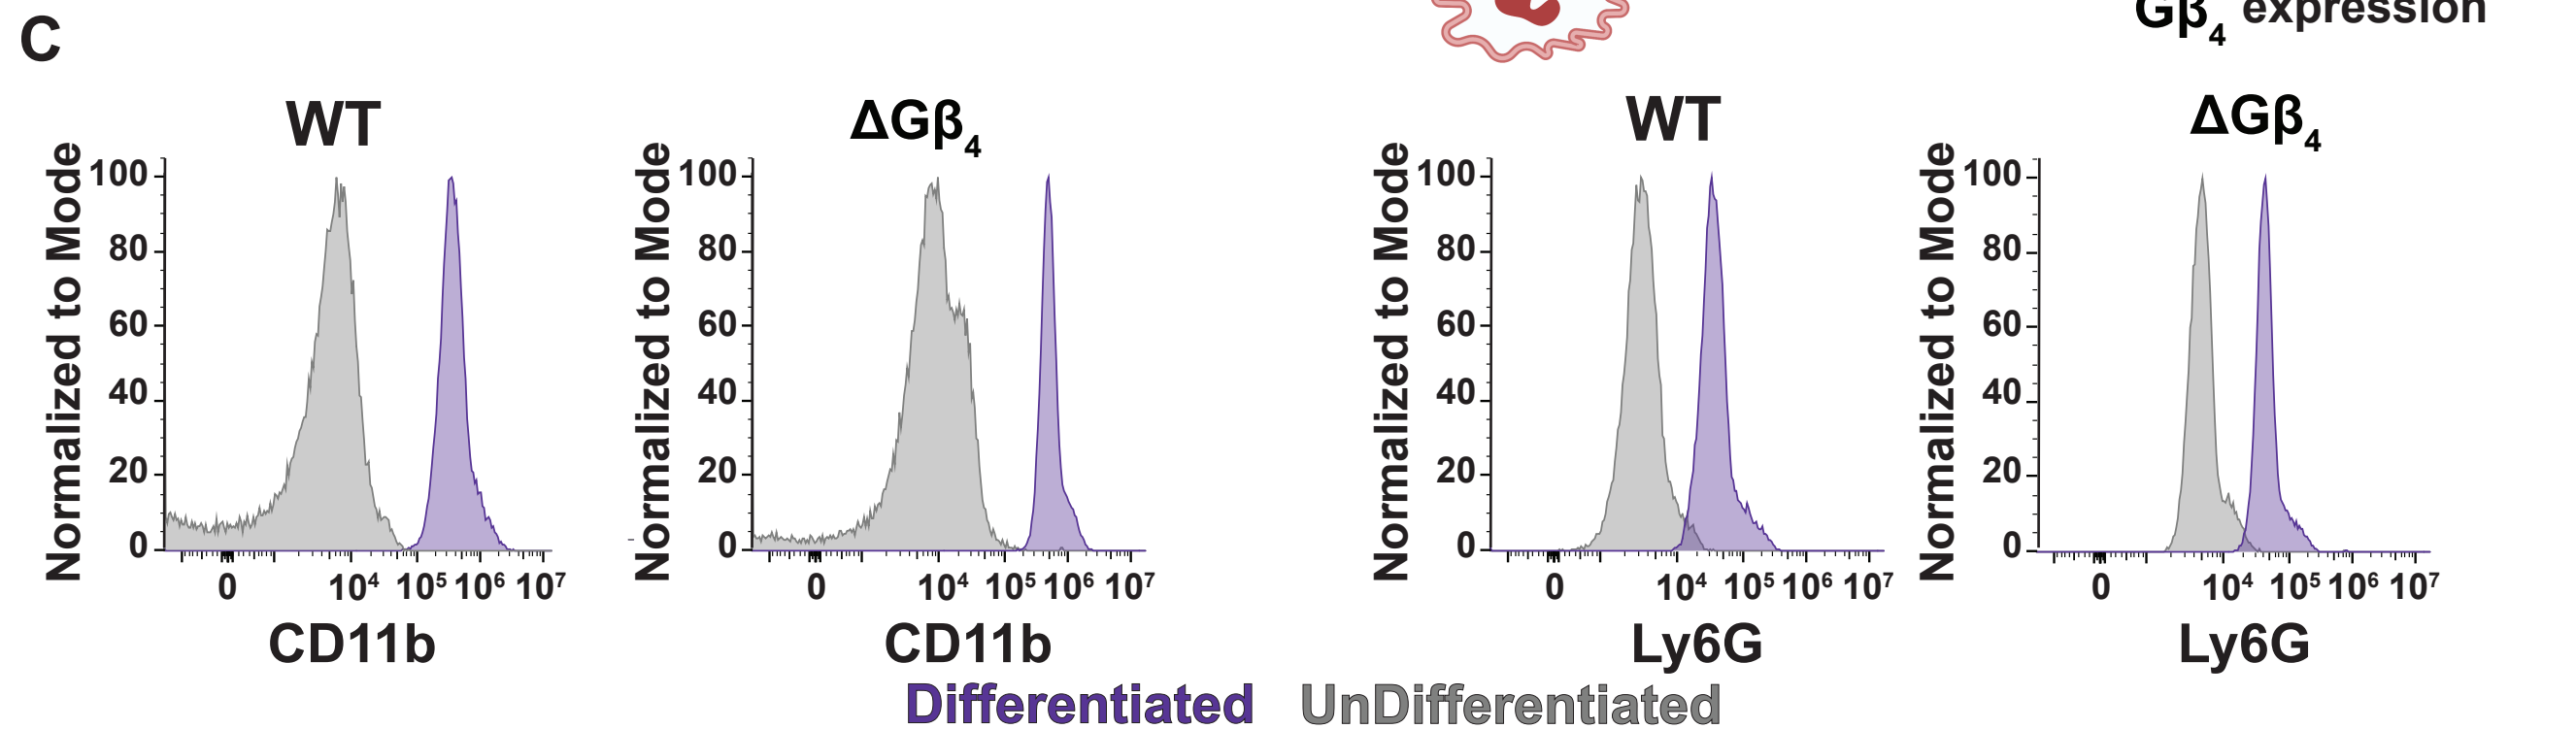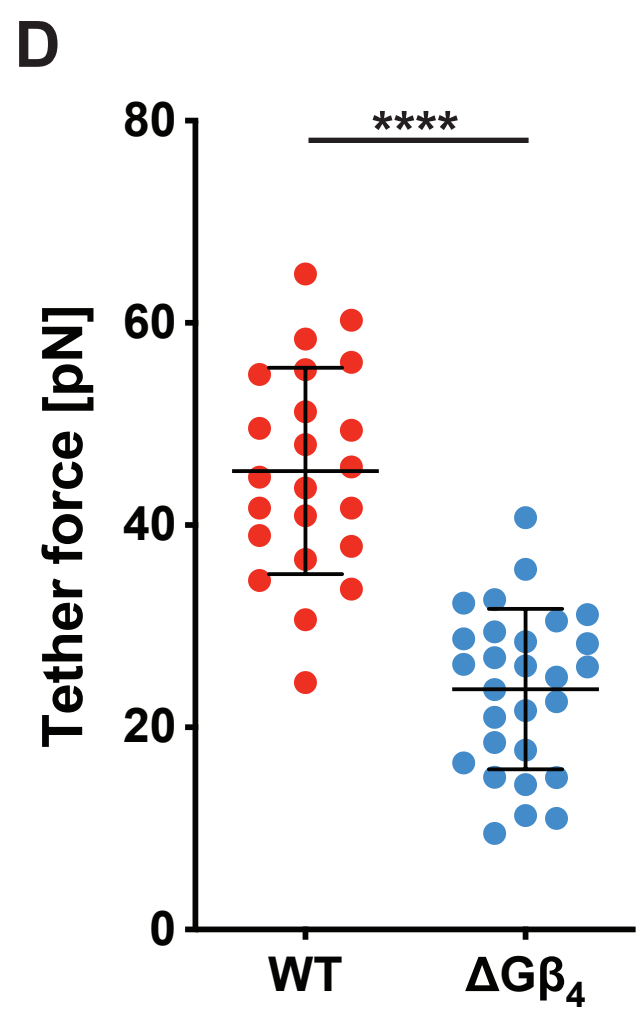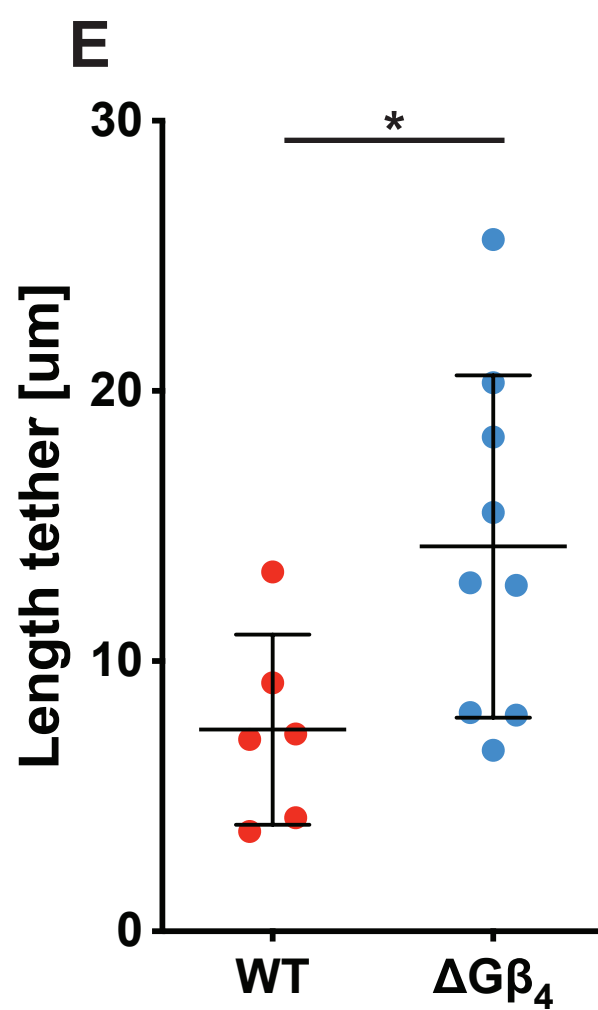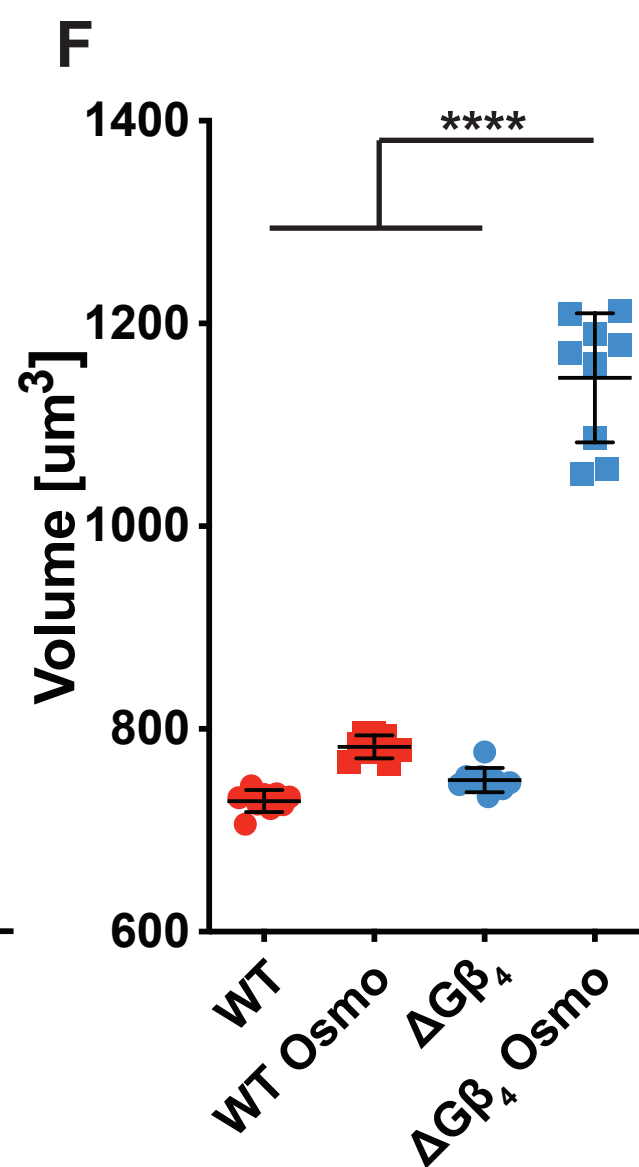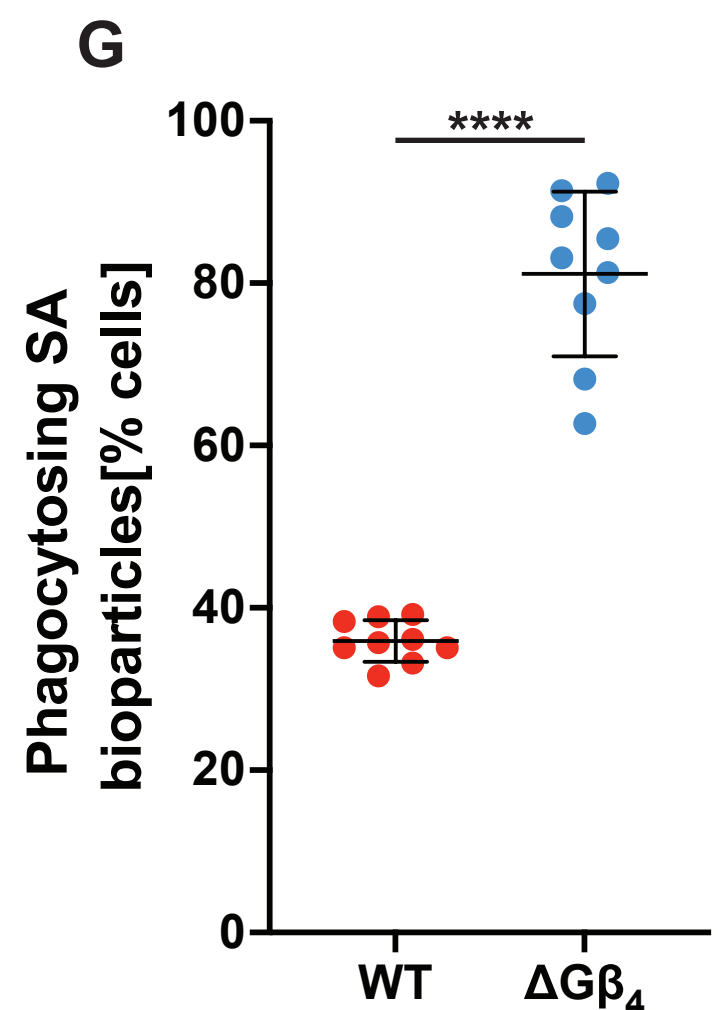

Supplement: NIHMS2002523-supplement-Sup_Fig10.pdf [file NIHMS2002523-supplement-Sup_Fig10.pdf]

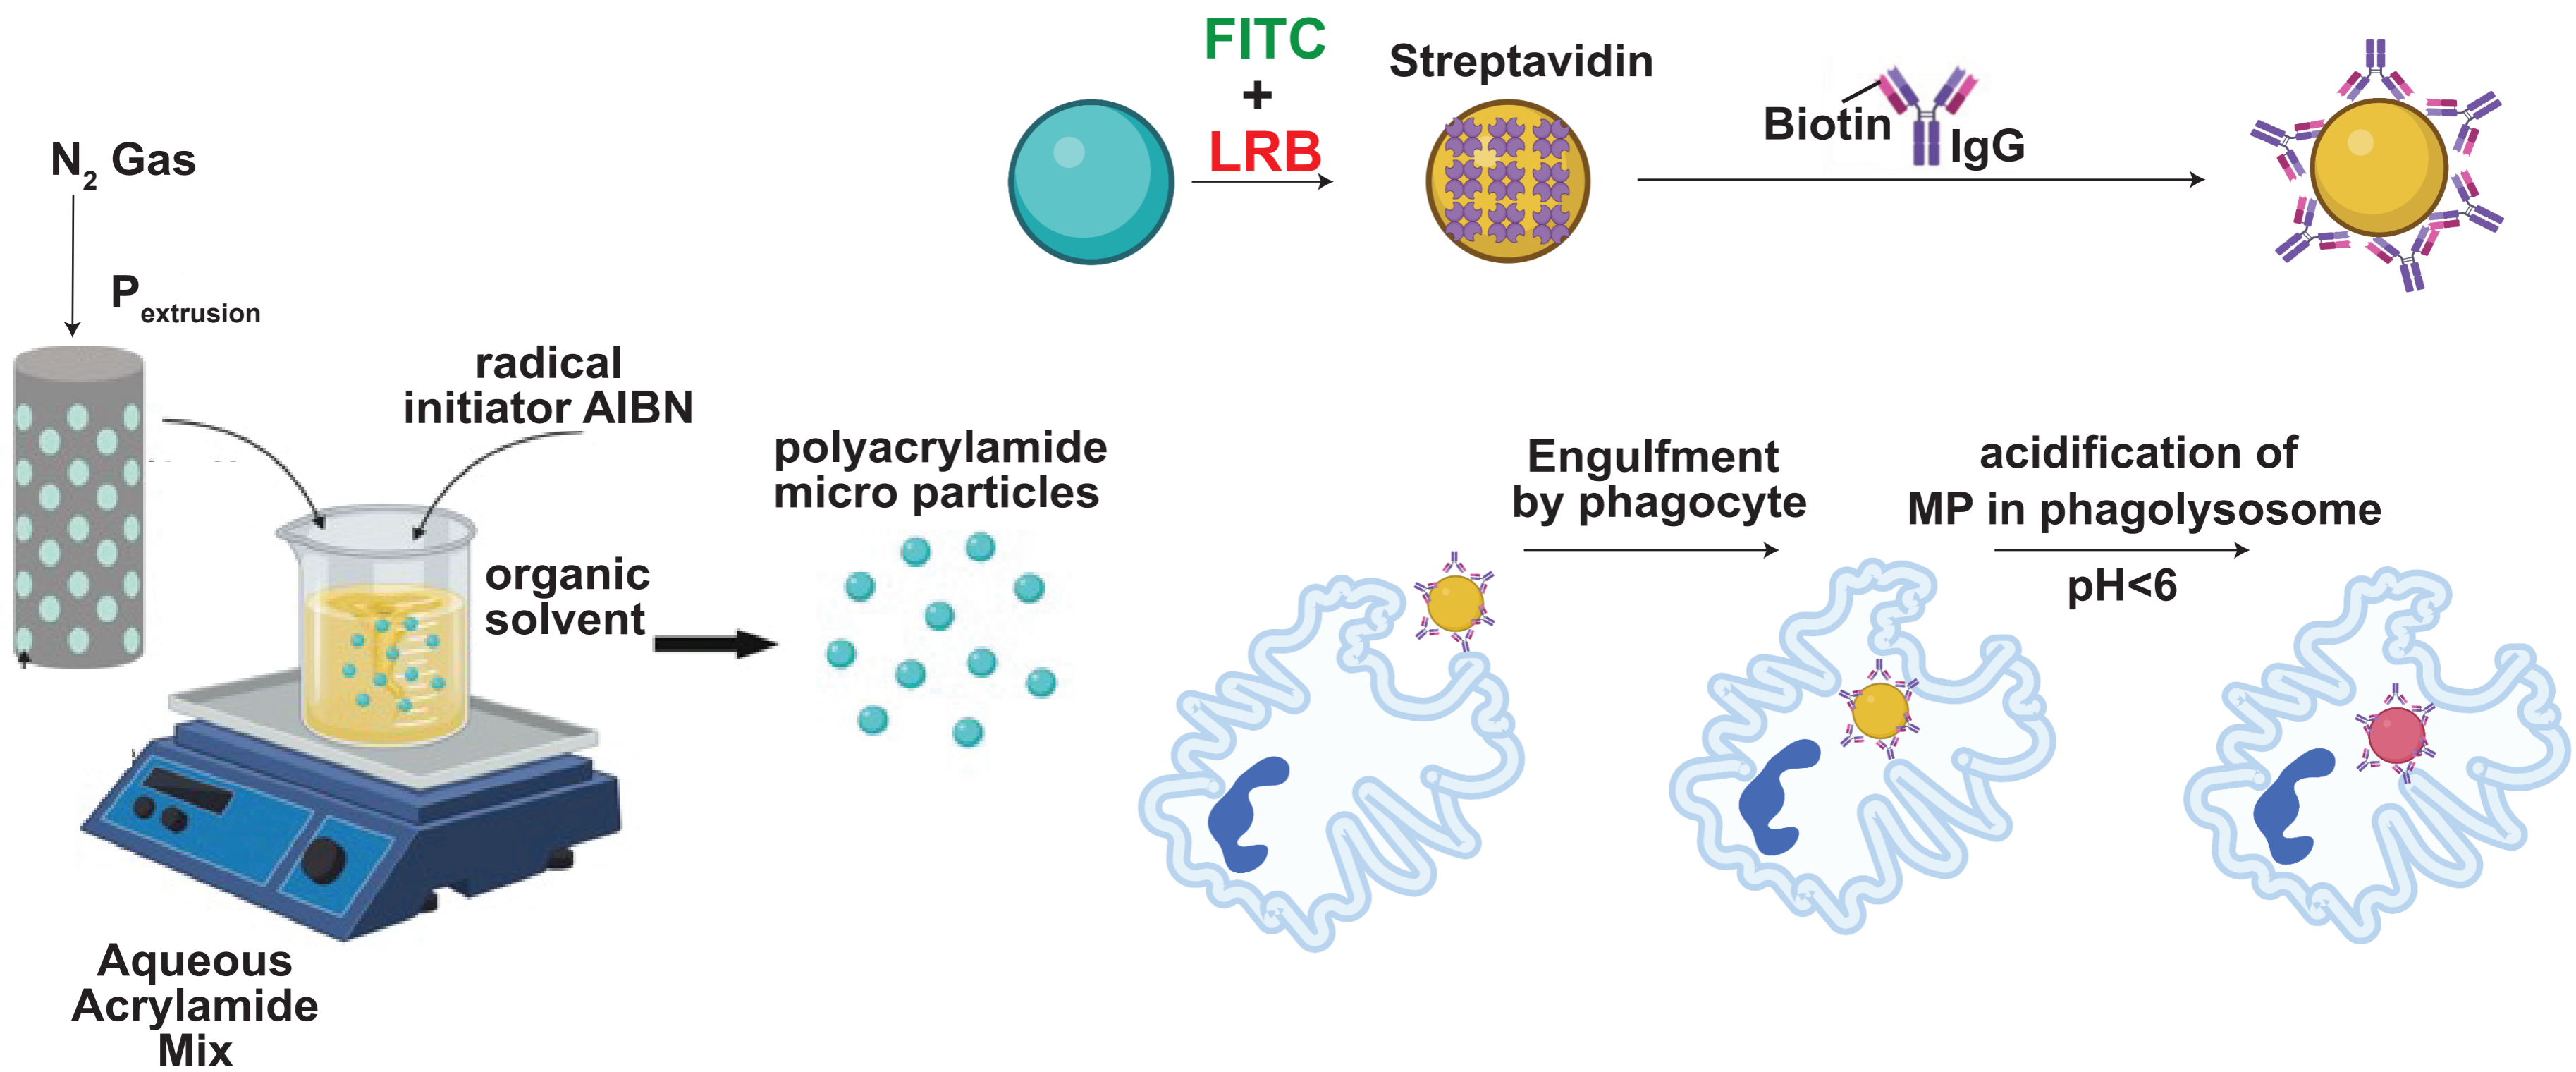

Supplement: NIHMS2002523-supplement-Sup_Fig2.pdf [file NIHMS2002523-supplement-Sup_Fig2.pdf]

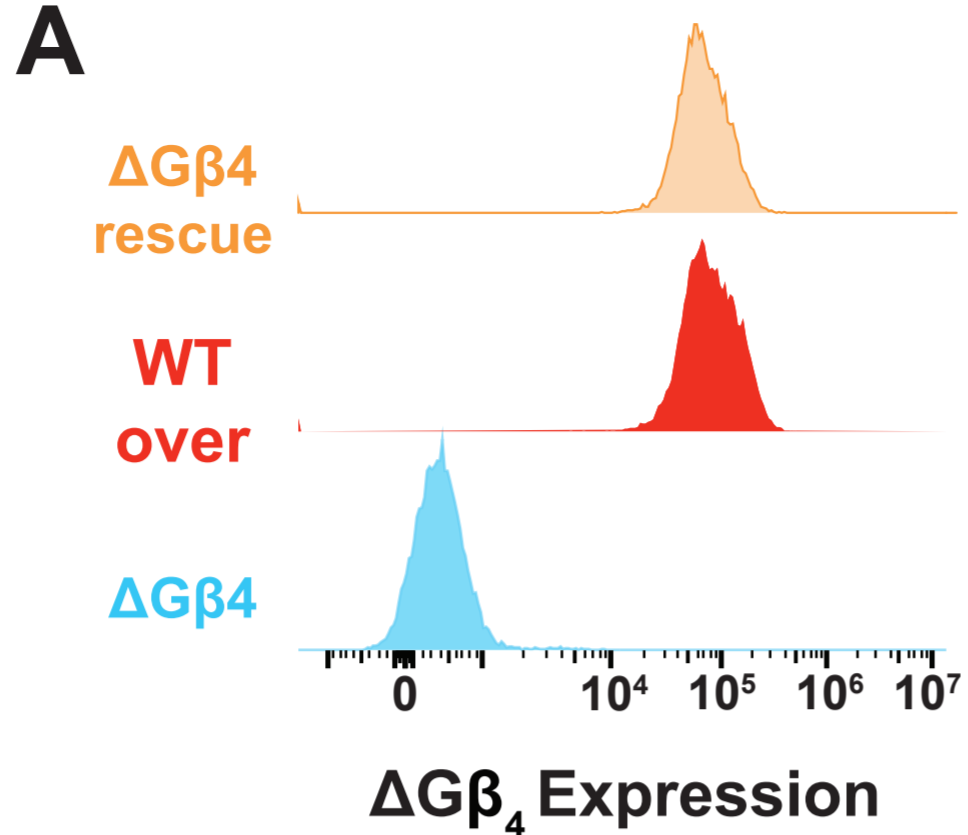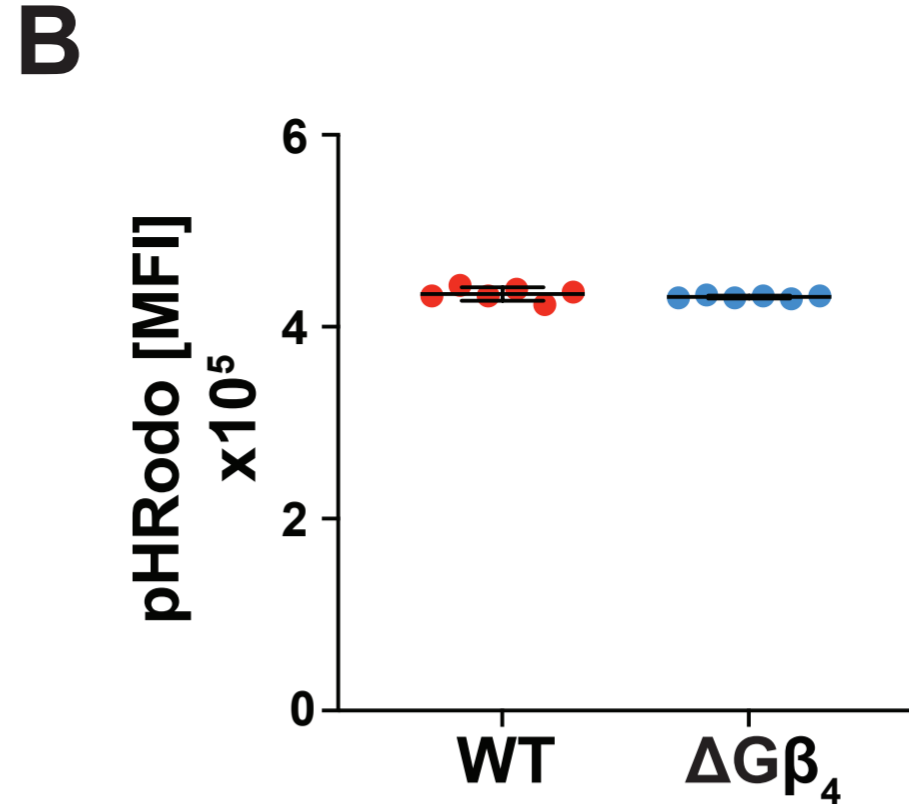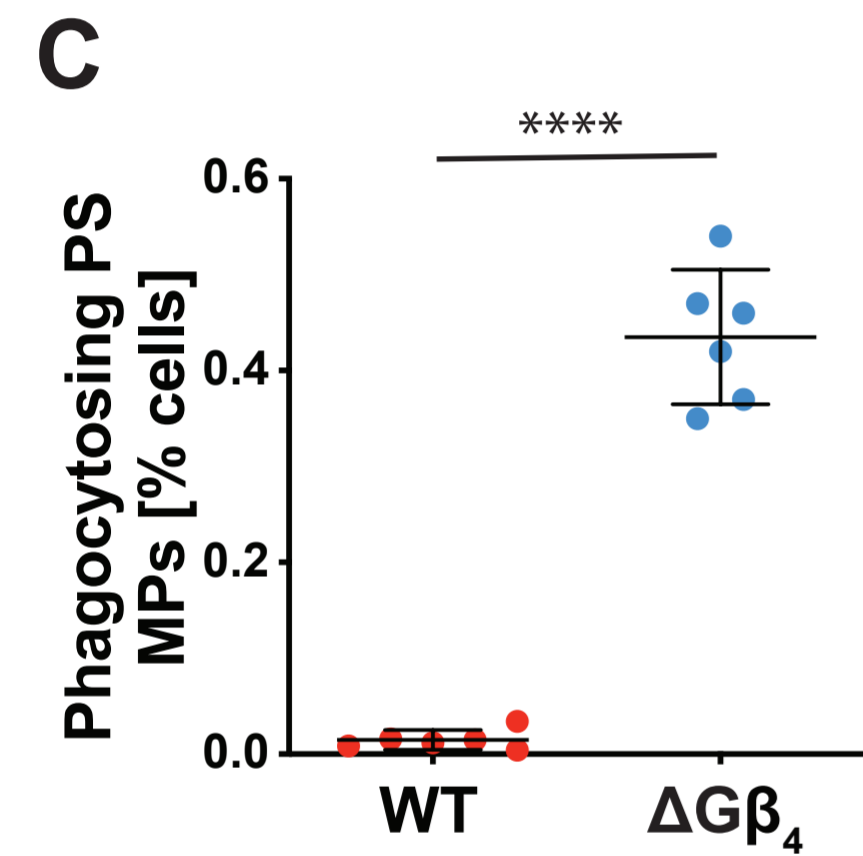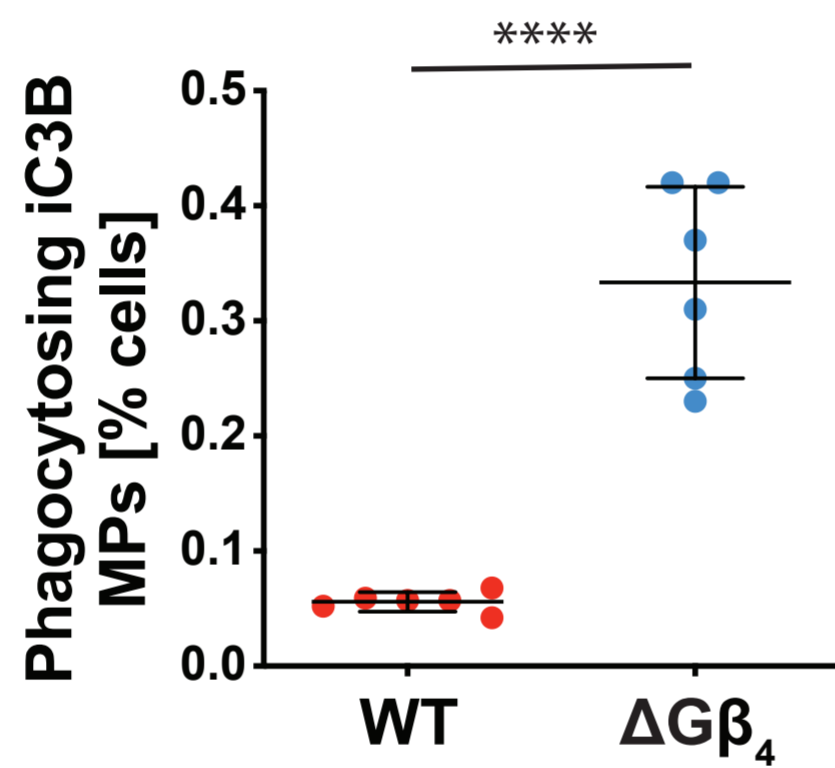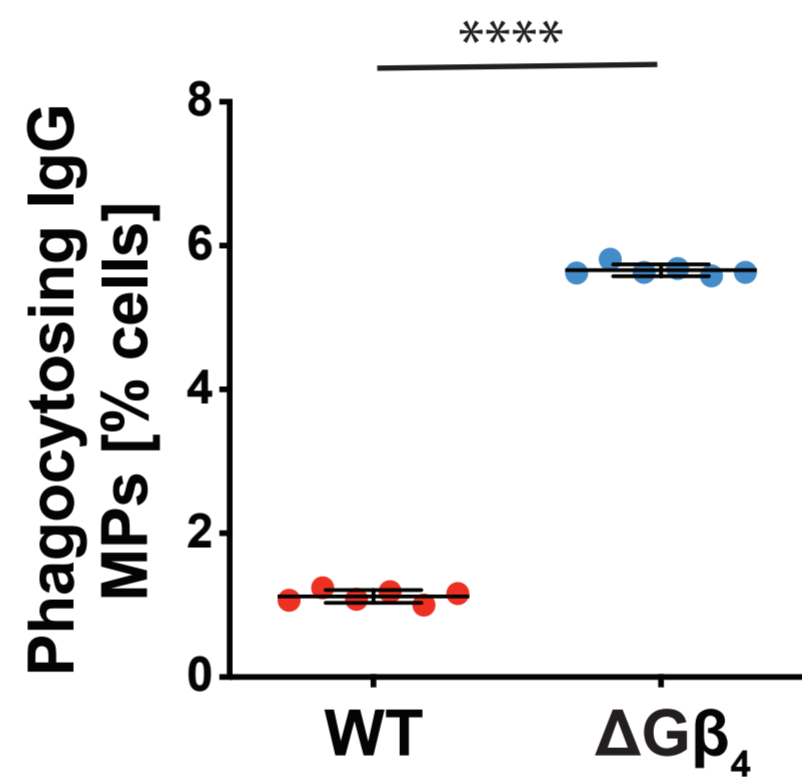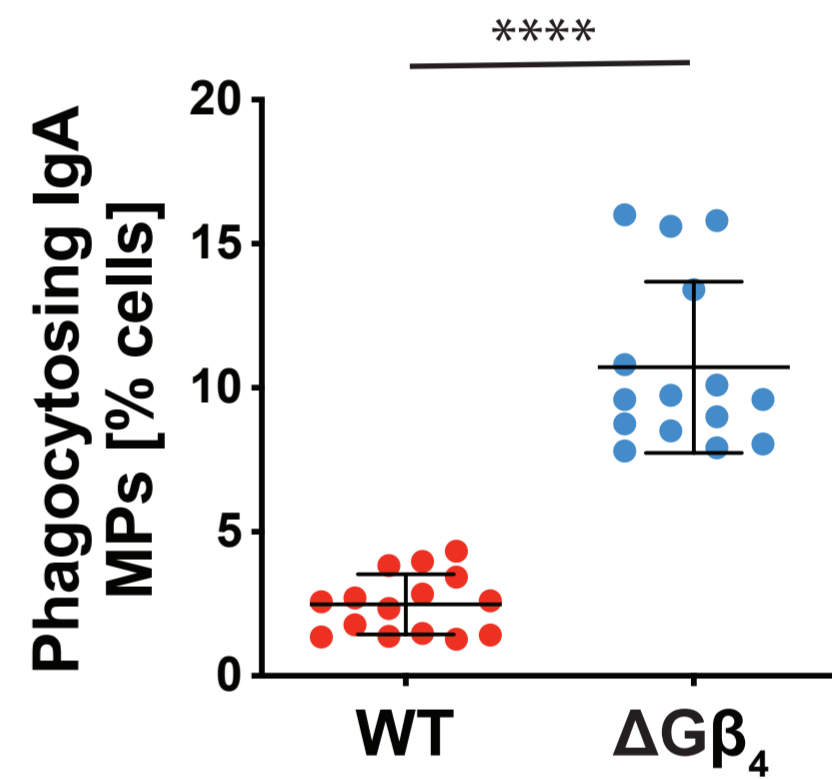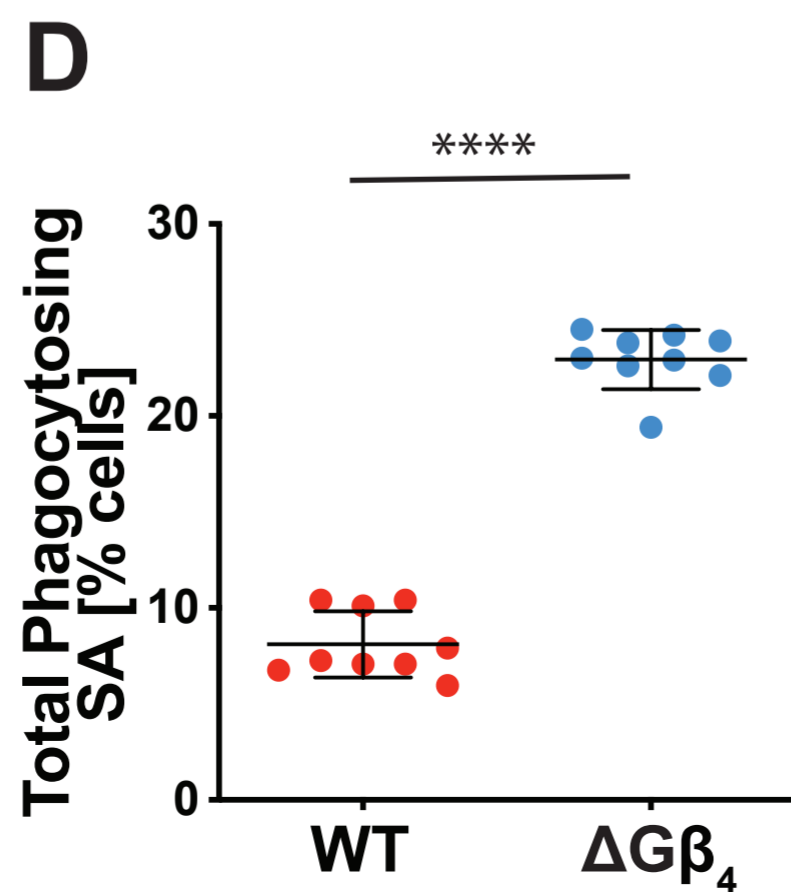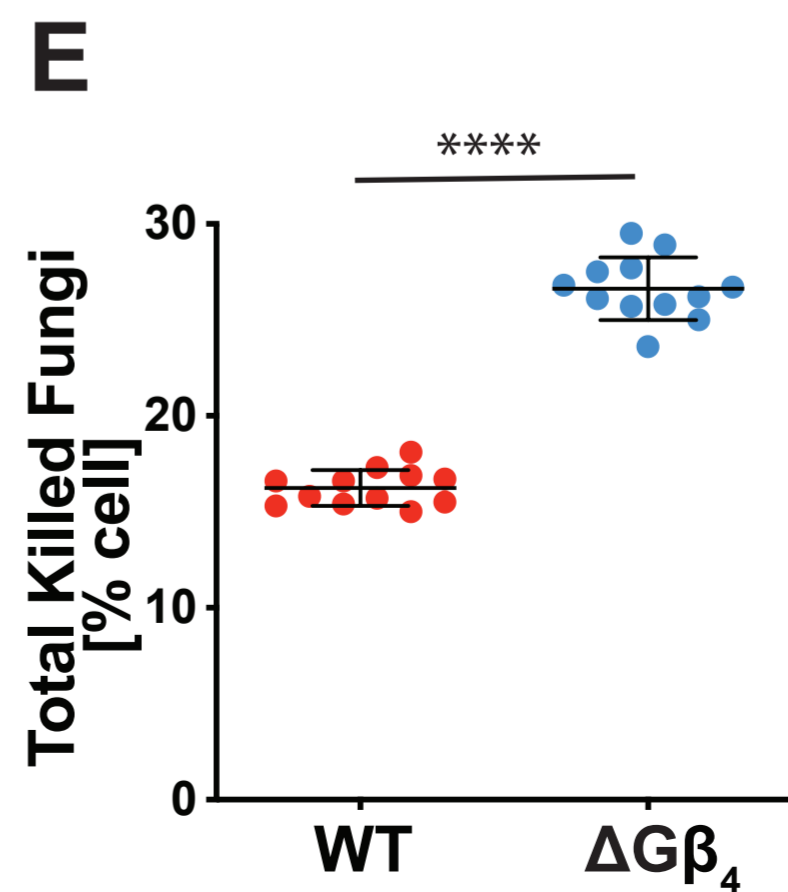

Supplement: NIHMS2002523-supplement-Sup_Fig3.pdf [file NIHMS2002523-supplement-Sup_Fig3.pdf]

**A**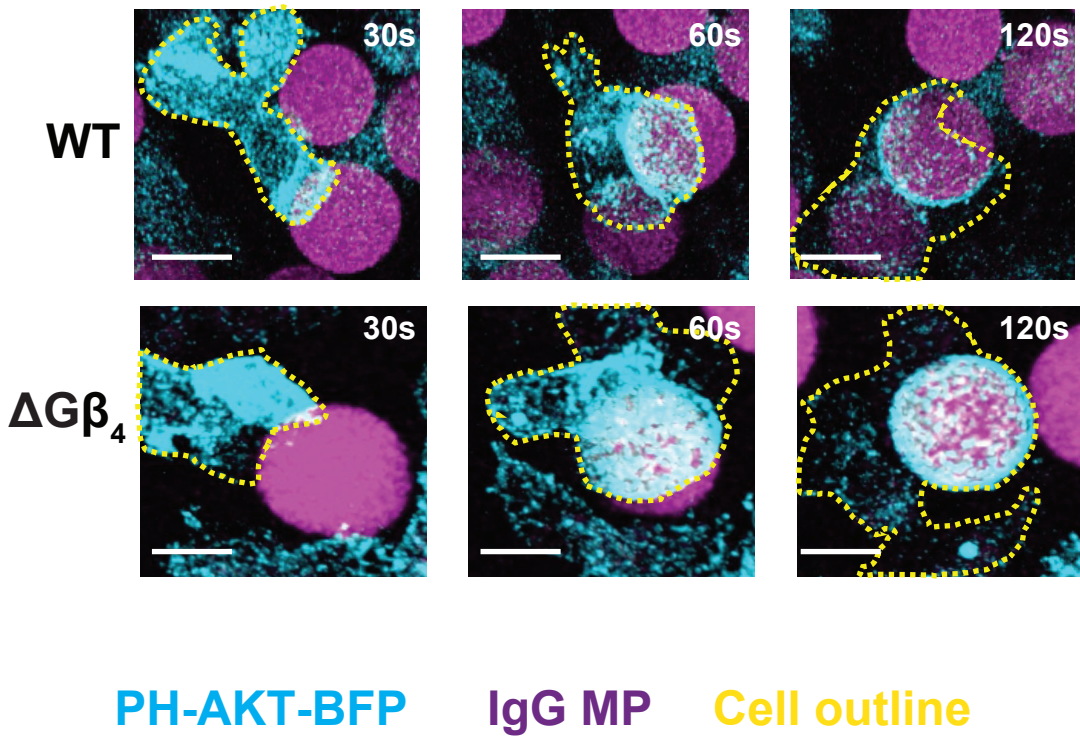**B**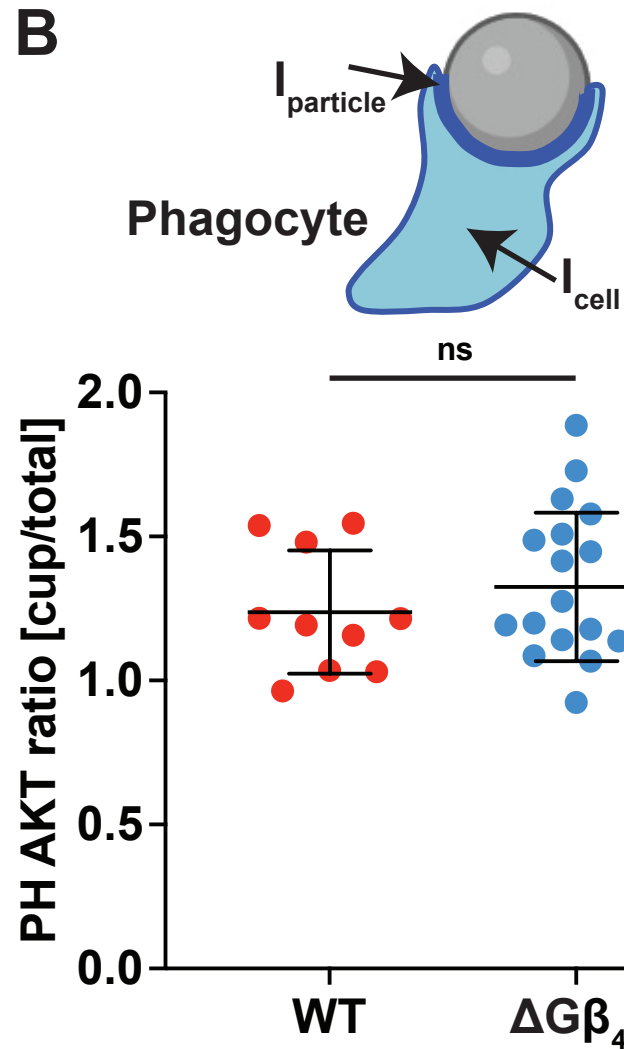**C**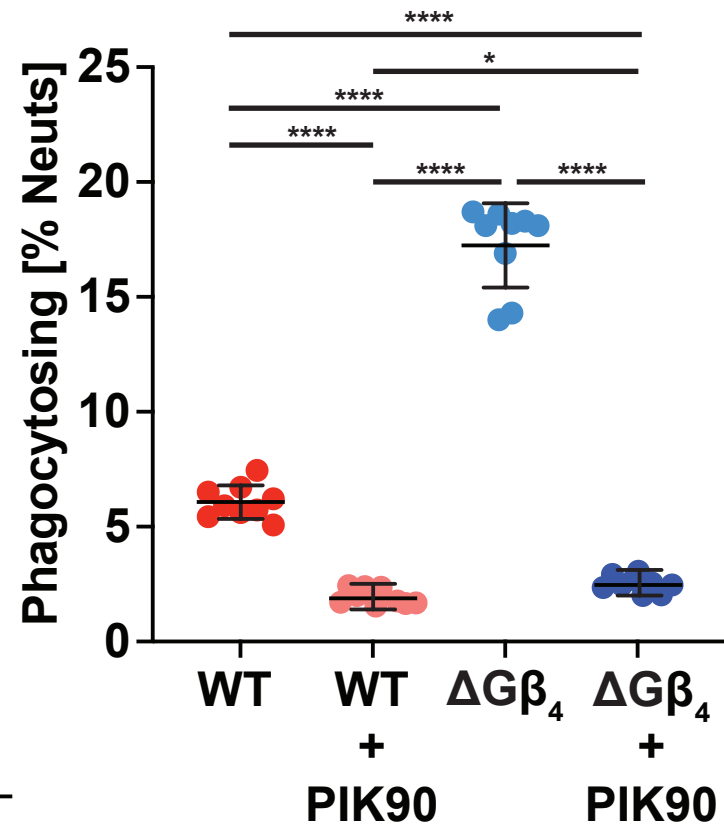

Supplement: NIHMS2002523-supplement-Sup_Fig4.pdf [file NIHMS2002523-supplement-Sup_Fig4.pdf]

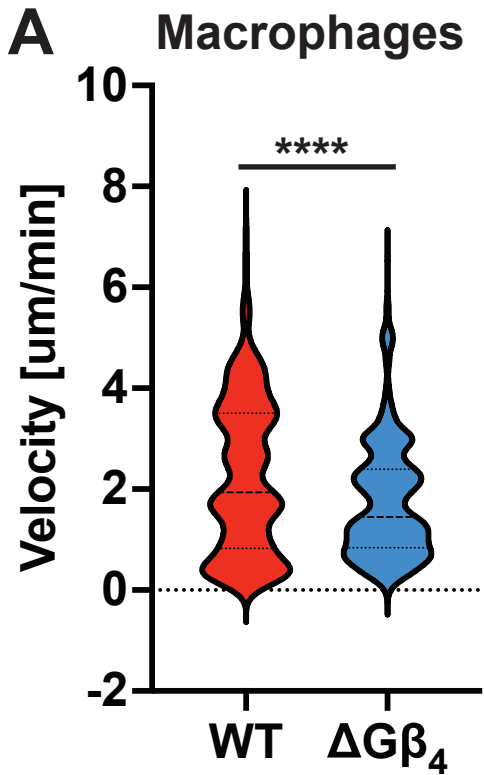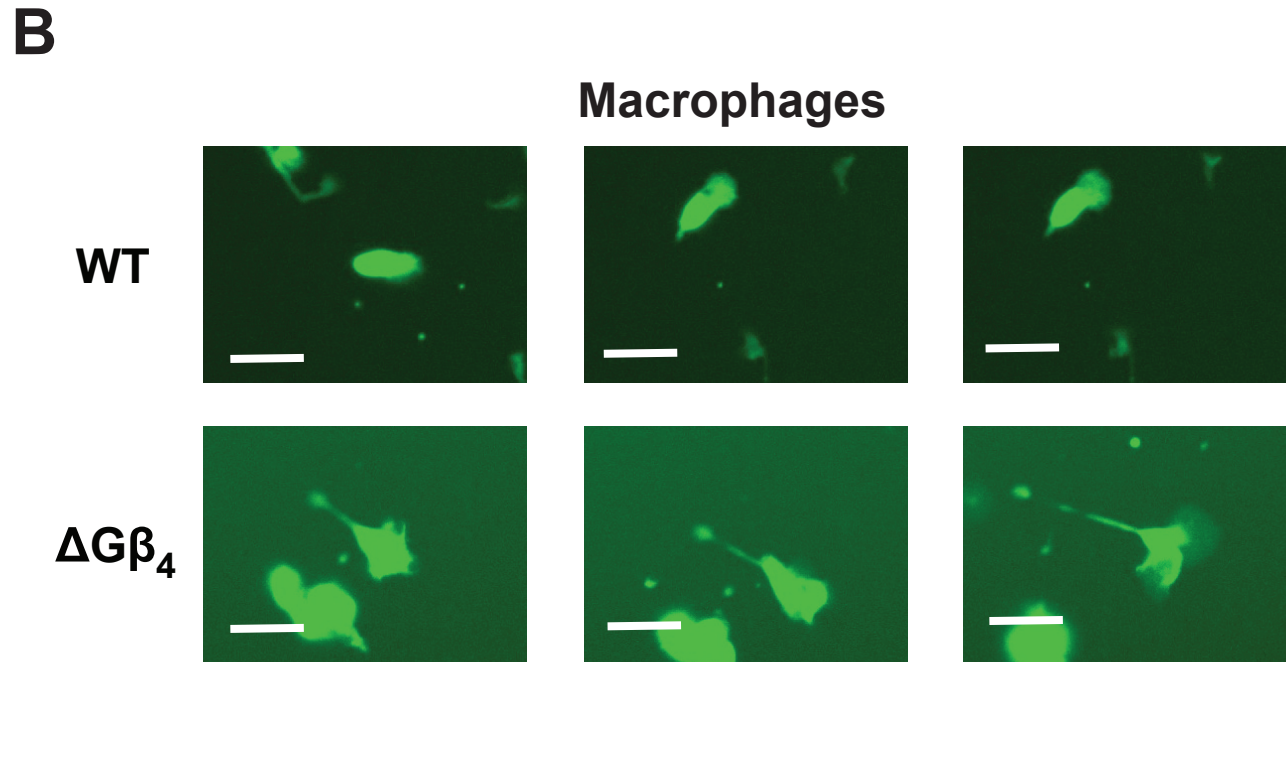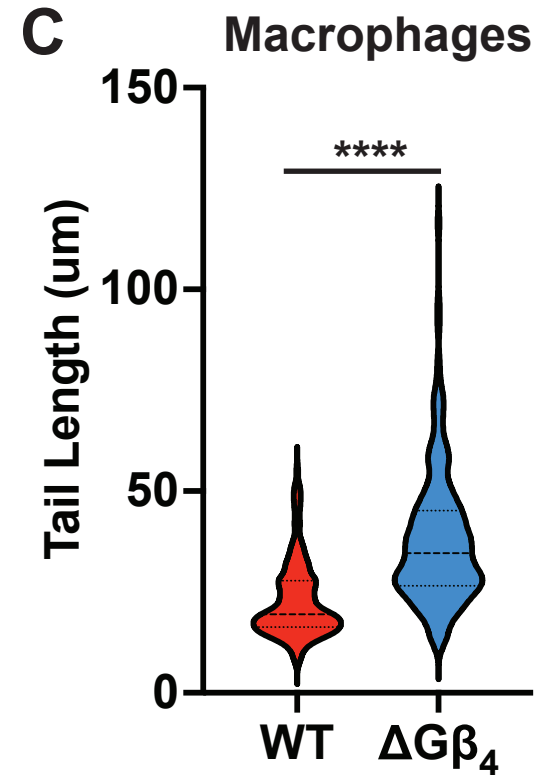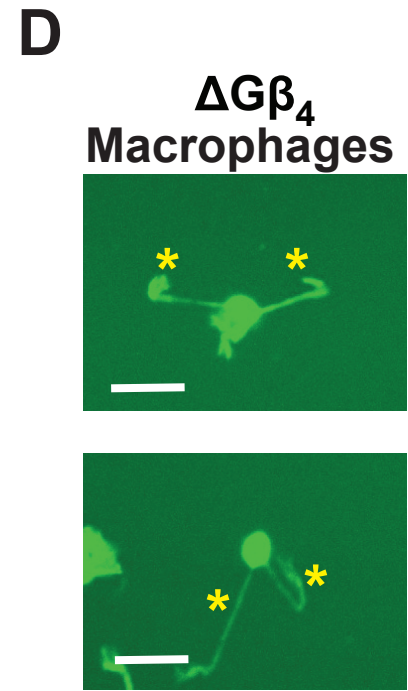

Supplement: NIHMS2002523-supplement-Sup_Fig5.pdf [file NIHMS2002523-supplement-Sup_Fig5.pdf]

**A**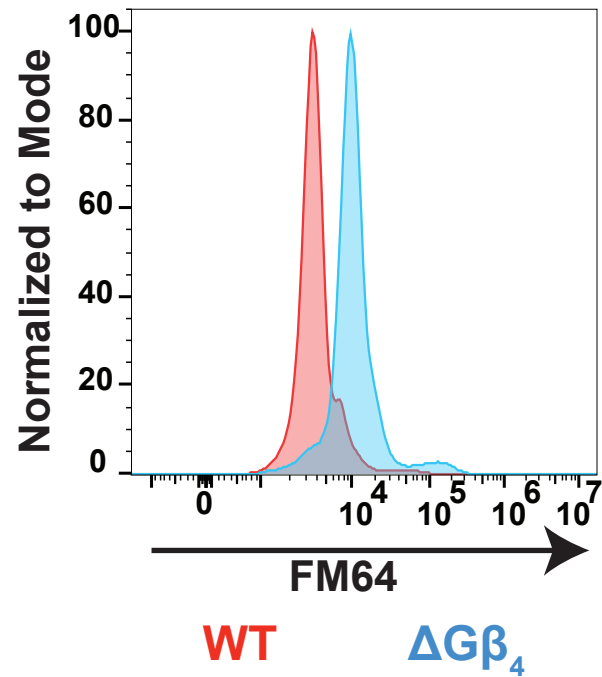**B**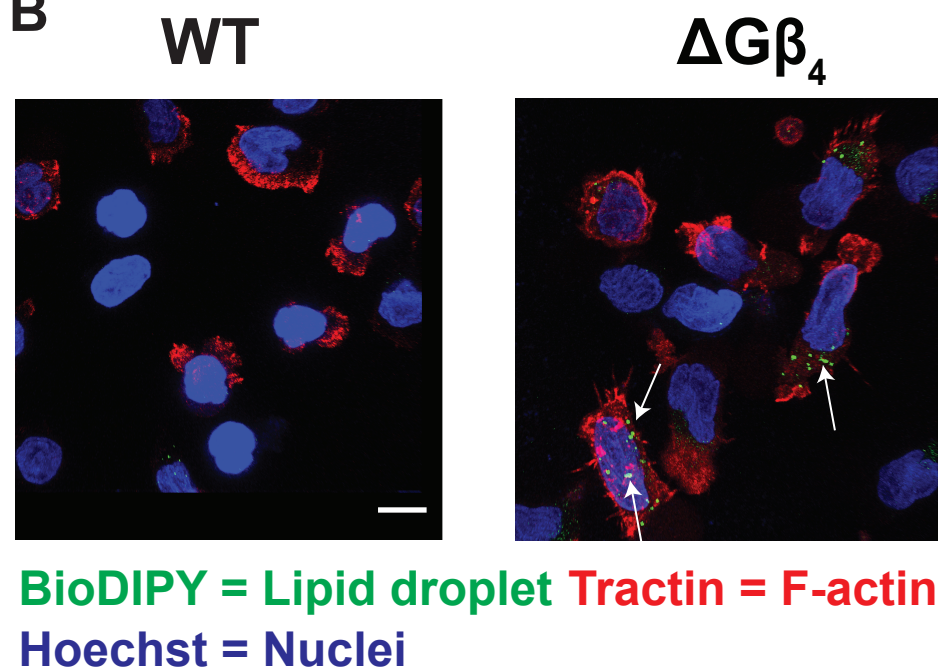**C**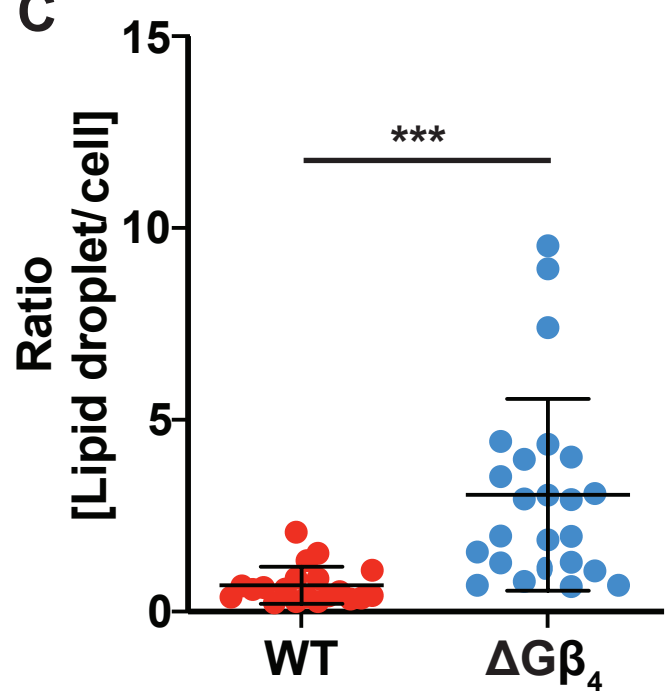

Supplement: NIHMS2002523-supplement-Sup_Fig6.pdf [file NIHMS2002523-supplement-Sup_Fig6.pdf]

WT

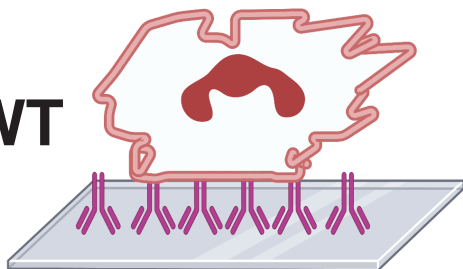

$\Delta G\beta_4$

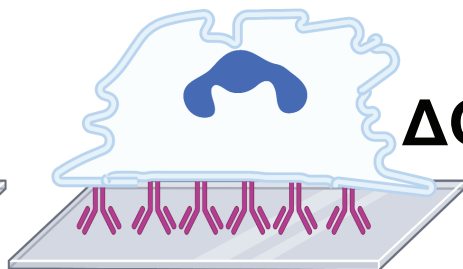

WT

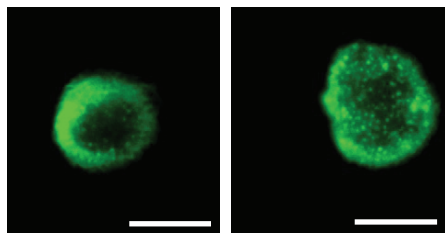

$\Delta G\beta_4$

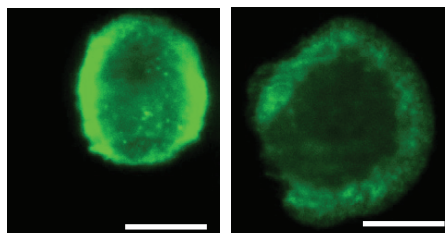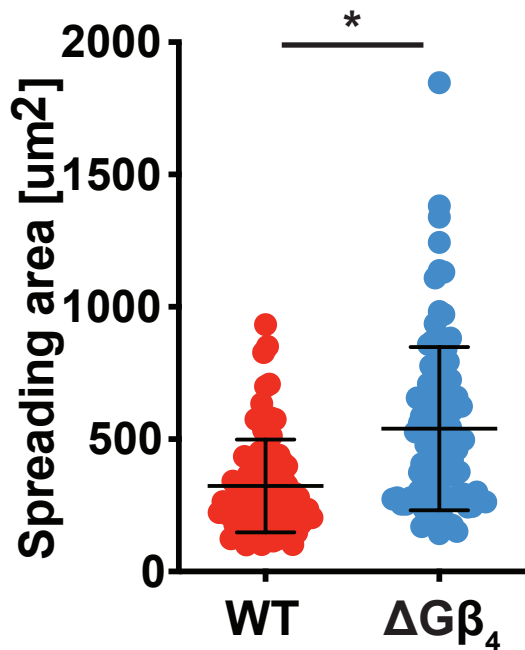

Supplement: NIHMS2002523-supplement-Sup_Fig8.pdf [file NIHMS2002523-supplement-Sup_Fig8.pdf]

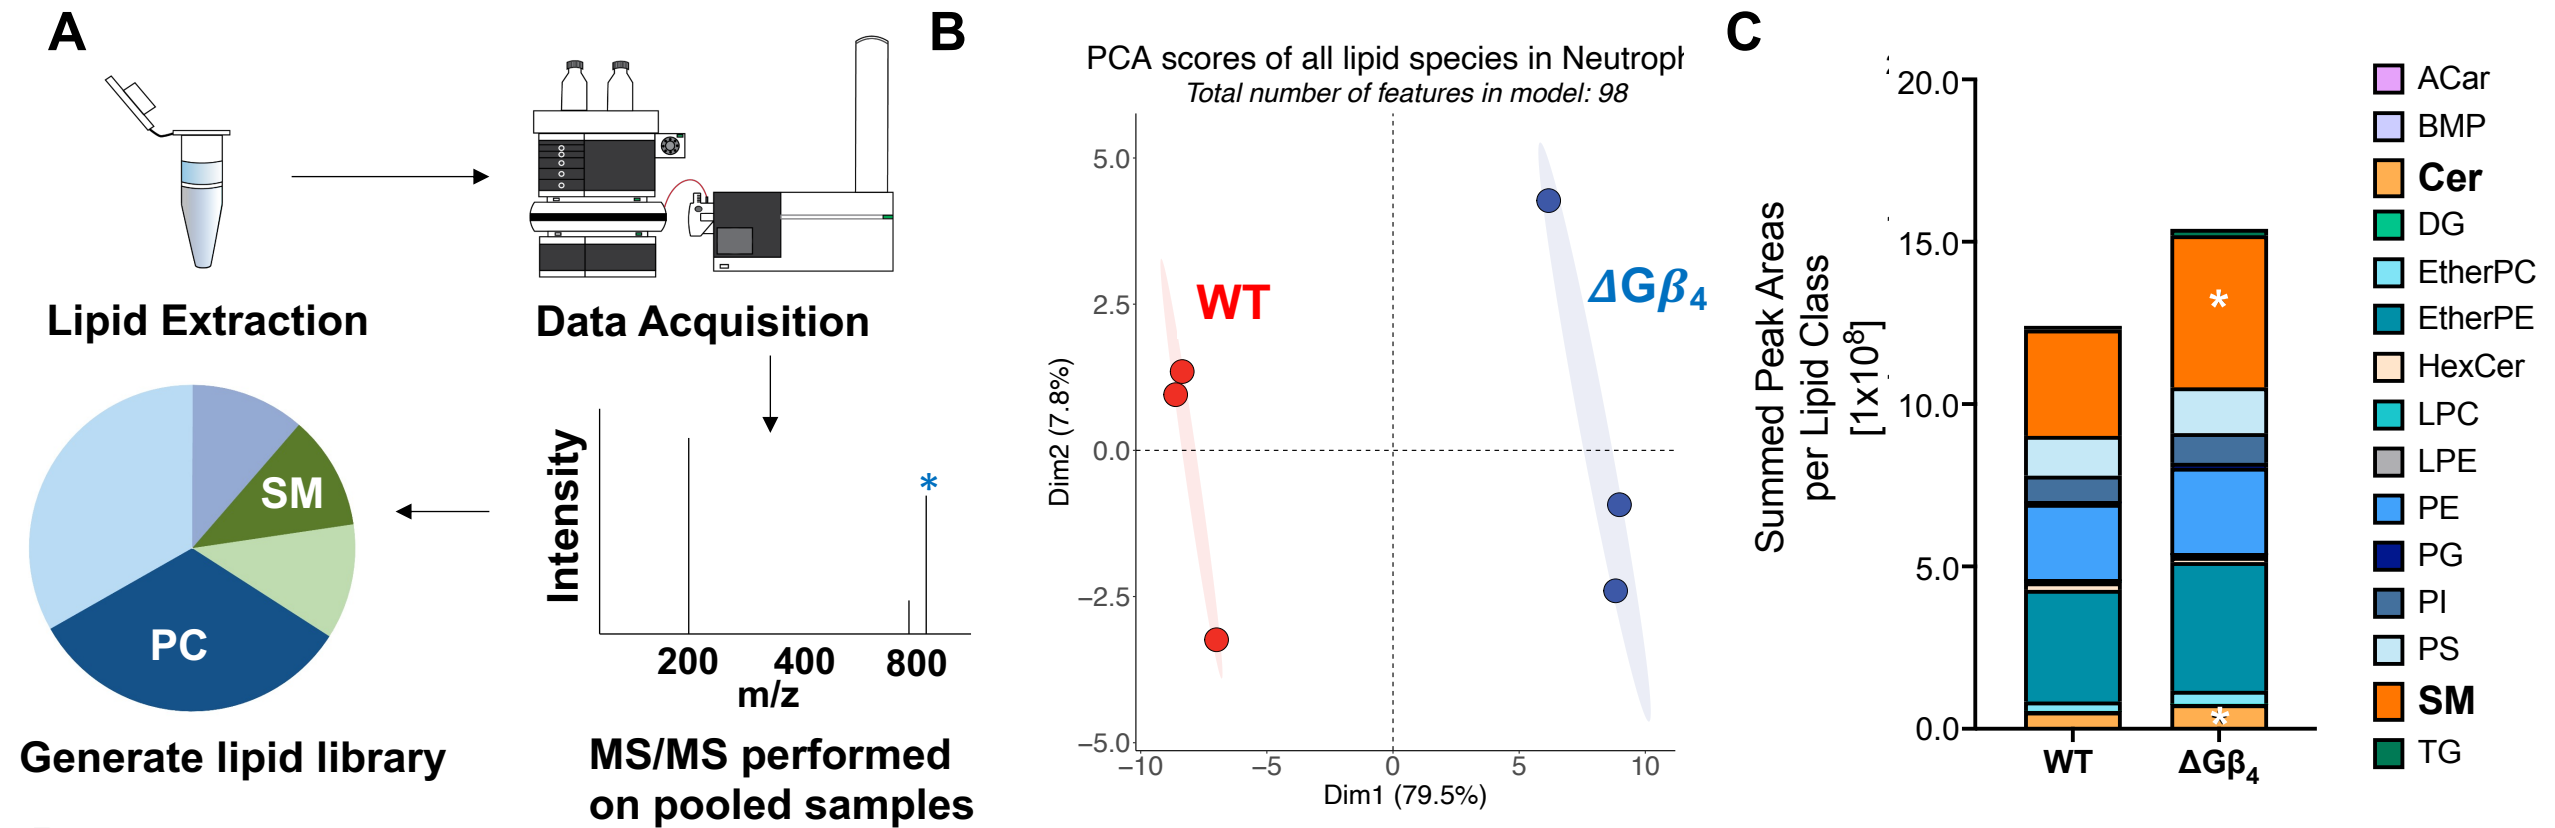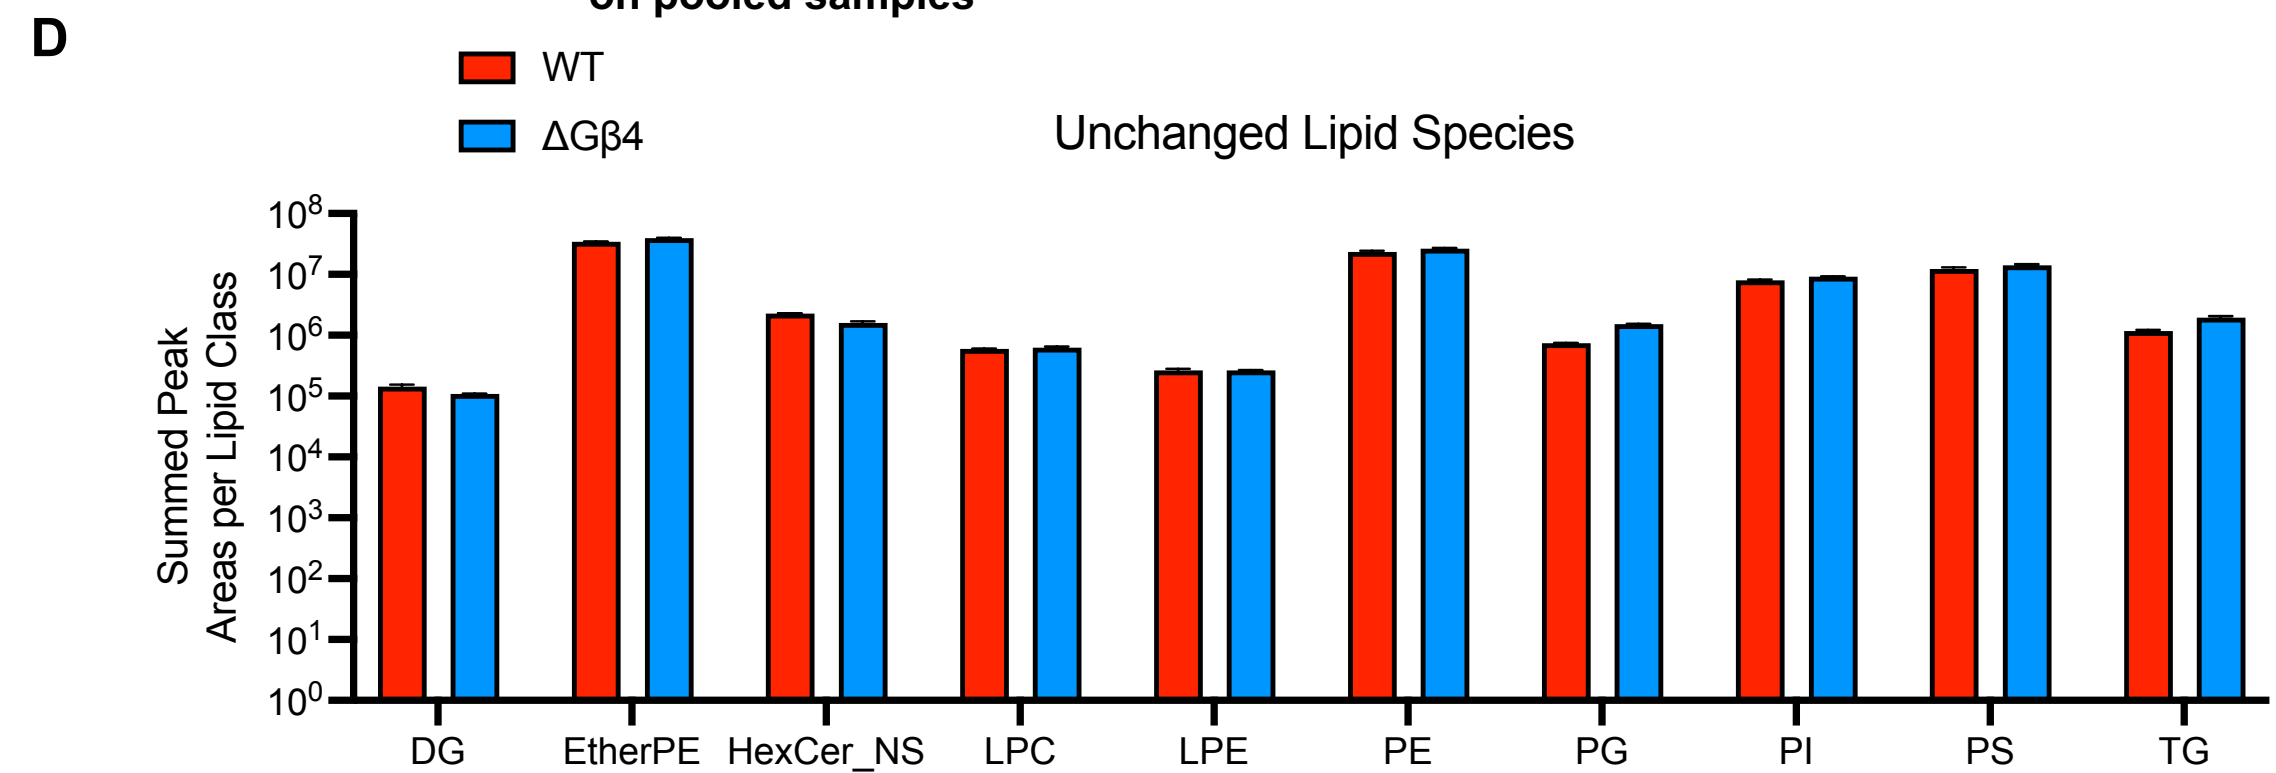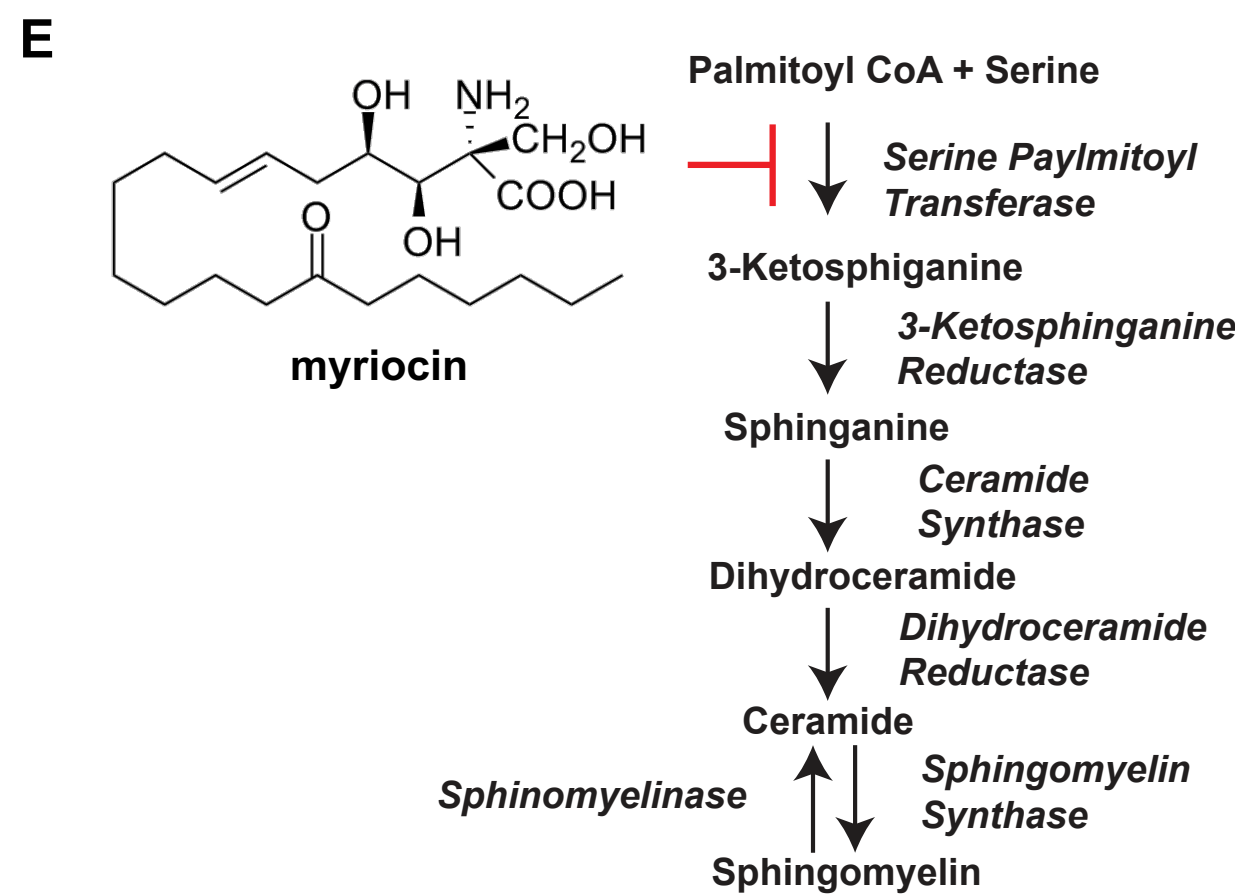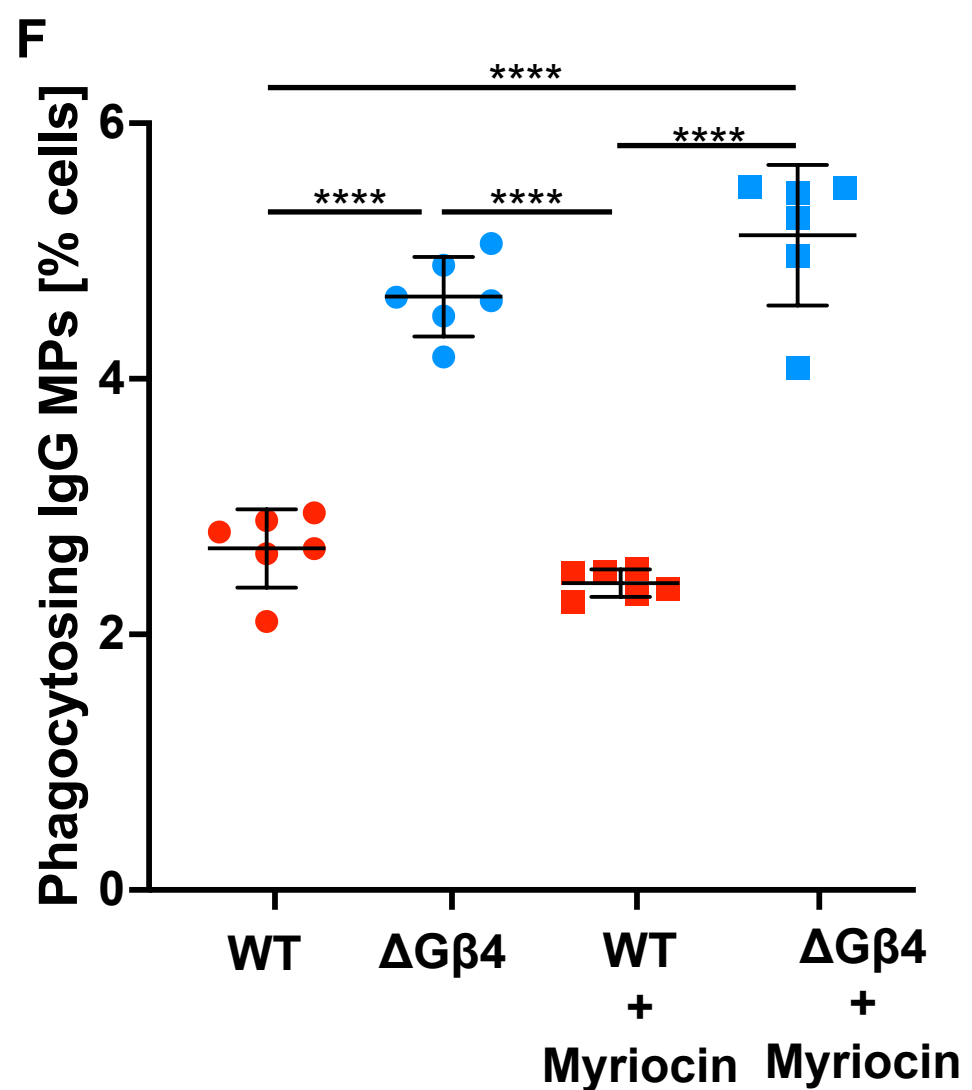

Supplement: NIHMS2002523-supplement-Sup_Fig9.pdf [file NIHMS2002523-supplement-Sup_Fig9.pdf]
